# Supplementary material for: Enantioselective N-heterocyclic carbene-catalyzed nucleophilic dearomatization of alkyl pyridiniums
Source: PubMed Central journal article supplement (PMC5627355; doi:10.1039/c7sc02648j), 2017-08-03
Supplement: SC-008-C7SC02648J-s001.pdf [file SC-008-C7SC02648J-s001.pdf]

## Enantioselective N-Heterocyclic Carbene-Catalyzed Nucleophilic Dearomatization of Alkyl Pyridiniums

### Supporting Information

Darrin M. Flanigan<sup>†,‡</sup>, Tomislav Rovis<sup>†,‡,\*</sup>

<sup>†</sup>Department of Chemistry, Colorado State University, Fort Collins, Colorado 80523, United States

<sup>‡</sup>Department of Chemistry, Columbia University, New York, New York 10027, United States

### Materials and Methods

All reactions were carried out with magnetic stirring under an atmosphere of argon in oven-dried glassware. Methanol was purchased from Sigma-Aldrich and stored in an anhydrous atmosphere. Sodium acetate was purchased from Aldrich and stored under anhydrous atmosphere.

<sup>1</sup>H NMR spectra were recorded on Varian 400 MHz spectrometer at ambient temperature or a Bruker Avance III 500 (500 MHz). Data is reported as follows: chemical shift in parts per million ( $\delta$ , ppm) from CDCl<sub>3</sub> (7.26 ppm) or acetone-D<sub>6</sub> (2.03 ppm), multiplicity (s = singlet, bs = broad singlet, d = doublet, t = triplet, q = quartet, and m = multiplet), coupling constants (Hz). <sup>13</sup>CNMR were recorded on Varian 400 MHz (at 100 MHz) spectrometer or a Bruker Avance III 500 (125 MHz) at ambient temperature. Chemical shifts are reported in ppm from CDCl<sub>3</sub> (77.36 ppm) or acetoneD-6 (205.87, 30.6 ppm). Mass spectra were recorded on an Agilent 6130 Quadrupole LC/MS. HPLC spectra were obtained on an Agilent 1100 series system. Optical rotations were obtained on an Autopol - III automatic polarimeter or a Jasco DIP - 1000 digital polarimeter. Infrared spectra were recorded on a Perkin - Elmer Spectrum Two (Diamond ATR) IR or a Nicolet iS-50 FT-IR spectrometer. Thin layer chromatography was performed on SiliCycle® 250 $\mu$ m 60A plates. Visualization was accomplished with UV light or KMnO<sub>4</sub> stain followed by heating.

### General Procedure for the synthesis of dihydropyridine derivatives

The 1,4-dihydropyridines were synthesized by combining 0.2 mmol of enal, 0.30 mmol pyridinium salt, 0.02 mmol NHC (10 mol%) and 0.2 mmol NaOAc in a vial equipped with a stir bar and Teflon cap. This mixture was then placed in an inert atmosphere (glove box) and diluted with 2 mL of methanol (0.1 M) along with 0.02 mmol acetic acid (20 mol%). The vial was then sealed and stirred at room temperature for 24 h. After this time, the solvent was evaporated and the crude reaction mixture was purified by silica chromatography (dry loading on celite) to afford the title compounds.

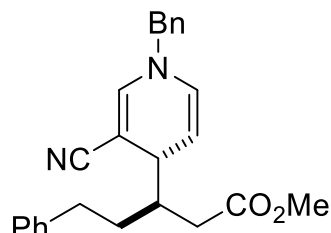

**methyl 3-(1-benzyl-3-cyano-1,4-dihydropyridin-4-yl)-5-phenylpentanoate (3a)**: Pale yellow oil. 61% yield, 5:1 rr, 3:1 dr, 88% ee.  $R_f = 0.3$  (4:1 Hexanes:EtOAc);  $[\alpha]_D^{21} = -32.8$  ( $c = 0.136$  g/mL); **HPLC analysis**: Chiralpak IA column, 80:20 hexanes/iso-propanol, 0.5 mL/min. Major: 18.1 min, minor: 16.8.  **$^1\text{H}$ NMR**: (500 MHz, Chloroform- $d$ )  $\delta$  7.31 (dd,  $J = 4.7, 2.5$  Hz, 5H), 7.23 (d,  $J = 6.0$  Hz, 3H), 7.17 – 7.14 (m, 2H), 6.74 (d,  $J = 1.5$  Hz, 1H), 5.89 (d,  $J = 8.1$  Hz, 1H), 4.63 (ddd,  $J = 7.2, 4.4, 2.7$  Hz, 1H), 4.29 (s, 2H), 3.69 (s, 3H), 3.48 (t,  $J = 3.7$  Hz, 1H), 2.69 – 2.65 (m, 2H), 2.41 (dd,  $J = 7.1, 4.1$  Hz, 2H), 2.13 – 1.98 (m, 2H), 1.62 (qd,  $J = 5.5, 2.8$  Hz, 2H);  **$^{13}\text{C}$ NMR**: (101 MHz, Chloroform- $d$ )  $\delta$  173.51, 144.24, 142.21, 136.07, 129.55, 129.02, 128.41, 127.12, 121.23, 103.51, 57.55, 51.68, 51.62, 41.73, 36.37, 35.66, 33.87, 33.04; **IR** (ATR, neat) 3026, 2923, 2856, 2191, 1730, 1672, 1590, 1412, 1181, 735, 701  $\text{cm}^{-1}$  **LRMS** (ESI + APCI)  $m/z$   $[\text{M}+\text{H}]$  calcd 387.2, found 387.2

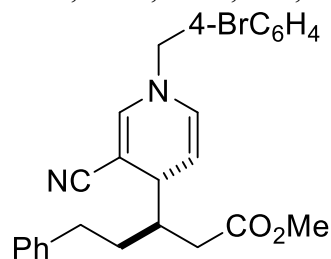

**methyl 3-(1-benzyl-3-cyano-1,4-dihydropyridin-4-yl)-5-methylhexanoate (3b)**: Pale yellow oil. 71% yield, 3:1 rr, 2:1 dr, 87% ee.  $R_f = 0.35$  (4:1 Hexanes:EtOAc);  $[\alpha]_D^{21} = -12.2$  ( $c = 0.01$  g/mL); **HPLC analysis**: Chiralpak IA column, 90:10 hexanes/iso-propanol, 1.0 mL/min. Major: 11.2 min, minor: 10.8 min.  **$^1\text{H}$ NMR**: (400 MHz, Chloroform- $d$ )  $\delta$  7.33 (dd,  $J = 25.5, 7.9$  Hz, 3H), 7.25 – 7.04 (m, 3H), 6.99 (d,  $J = 8.4$  Hz, 2H), 6.69 (d,  $J = 1.6$  Hz, 1H), 5.91 – 5.76 (m, 1H), 4.61 (dd,  $J = 8.1, 4.4$  Hz, 1H), 4.21 (s, 2H), 3.67 (s, 3H), 3.52 – 3.40 (m, 1H), 2.80 – 2.56 (m, 2H), 2.42 – 2.27 (m, 2H), 2.21 – 1.92 (m, 2H), 1.76 – 1.47 (m, 2H);  **$^{13}\text{C}$ NMR**: (101 MHz, Chloroform- $d$ )  $\delta$  173.33, 143.92, 142.15, 129.30, 128.36, 125.91, 122.19, 120.89, 103.67, 103.01, 81.70, 81.22, 56.91, 51.67, 41.57, 41.21, 36.40, 35.57, 33.86, 33.16; **IR** (ATR, neat) 3060, 3025, 2923, 2857, 2191, 1729, 1672, 1591, 1435, 1404, 1178, 1010  $\text{cm}^{-1}$  **LRMS** (ESI + APCI)  $m/z$   $[\text{M}+\text{H}]$  calcd 465.1, found 465.1

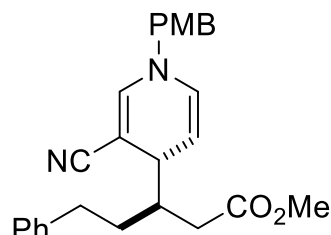

**methyl 3-(3-cyano-1-(4-methoxybenzyl)-1,4-dihydropyridin-4-yl)-5-phenylpentanoate (3c)**: Pale yellow oil. 50% yield, 6:1 rr, 3:1 dr, 85% ee.  $R_f = 0.3$  (4:1 Hexanes:EtOAc);  $[\alpha]_D^{21} = -22.2$  ( $c = 0.01$  g/mL); **HPLC analysis**: Chiralpak IA column, 90:10 hexanes/iso-propanol, 1.0 mL/min. Major: 12.0 min, minor: 10.8 min.  **$^1\text{H}$ NMR**: (400 MHz, Chloroform- $d$ )  $\delta$  7.33 – 7.27 (m, 3H), 7.23 – 7.15 (m, 5H), 7.09 (d,  $J = 8.8$  Hz, 2H), 7.05 (d,  $J = 8.8$  Hz, 2H), 6.86 (d,  $J = 8.7$  Hz, 2H), 6.79 (d,  $J = 8.7$  Hz, 2H), 6.70 (d,  $J = 1.6$  Hz, 1H), 5.86

(ddd,  $J = 8.2, 1.7, 0.9$  Hz, 1H), 4.59 (dd,  $J = 8.1, 4.4$  Hz, 1H), 4.19 (s, 2H), 3.79 (s, 3H), 3.66 (s, 3H), 3.46 – 3.41 (m, 1H), 2.80 – 2.59 (m, 4H), 2.34 – 2.22 (m, 1H), 2.15 – 1.94 (m, 3H), 1.74 – 1.50 (m, 3H);  $^{13}\text{CNMR}$ : (101 MHz;  $\text{CDCl}_3$ ):  $\delta$  173.5, 159.5, 144.1, 142.2, 129.4, 128.5, 128.4, 128.4, 127.9, 121.3, 114.4, 103.4, 80.4, 57.1, 55.3, 51.6, 41.8, 41.3, 36.4, 35.6, 33.9, 33.0; **IR** (ATR, neat) 3061, 3026, 2925, 2856, 2191, 1731, 1672, 1588, 1513, 1412, 1248, 1175  $\text{cm}^{-1}$  **LRMS** (ESI + APCI)  $m/z$  [M+H] calcd 417.2, found 417.2

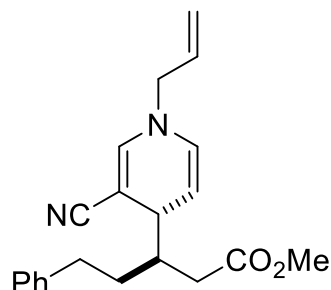

**methyl 3-(1-allyl-3-cyano-1,4-dihydropyridin-4-yl)-5-**

**phenylpentanoate (3d)**: Pale yellow oil. 45% yield, 3:1 rr, 3:1 dr, 86% ee.  $R_f = 0.2$  (4:1 Hexanes:EtOAc);  $[\alpha]_D^{21} = -19.3$  ( $c = 0.01$  g/mL); **HPLC analysis**: Chiralpak IA column, 90:10 hexanes/iso-propanol, 1.0 mL/min. Major: 16.0 min, minor: 14.5 min.  $^1\text{HNMR}$ : (400 MHz, Chloroform- $d$ )  $\delta$  7.30 – 7.28 (m, 3H), 7.21 – 7.16 (m, 2H), 6.64 (d,  $J = 4$  Hz, 1H), 5.71 – 5.68 (m, 1H), 5.84 – 5.82 (m, 1H), 5.25 – 5.17 (m, 2H), 4.58 (dd,  $J = 4, 8$  Hz, 1H), 3.66 (s, 3H), 3.47 – 3.43 (m, 1H), 2.75 – 2.62 (m, 3H), 2.45 – 2.25 (m, 2H), 2.05 – 1.96 (m, 2H), 1.68 – 1.56 (m, 2H);  $^{13}\text{CNMR}$ : (101 MHz;  $\text{CDCl}_3$ ):  $\delta$  173.50, 148.26, 143.98, 142.14, 132.68, 129.29, 128.36, 125.78, 121.27, 118.66, 109.60, 103.41, 102.07, 80.26, 56.13, 21.61, 41.91, 41.20, 36.26, 35.69, 33.79, 33.63, 32.97, 32.55; **IR** (ATR, neat) 3061, 3025, 2925, 2860, 2192, 1673, 1591, 1412, 1218, 1189  $\text{cm}^{-1}$  **LRMS** (ESI + APCI)  $m/z$  [M+H] calcd 337.2, found 337.2

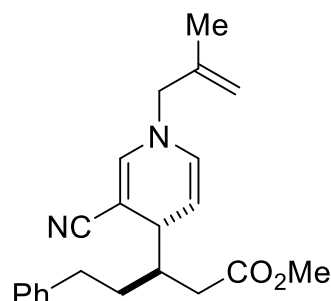

**methyl 3-(3-cyano-1-(3-methylbut-3-en-1-yl)-1,4-dihydropyridin-4-**

**yl)-5-phenylpentanoate (3e)**: Pale yellow oil. 38% yield, 4:1 rr, 2:1 dr, 89% ee.  $R_f = 0.3$  (4:1 Hexanes:EtOAc);  $[\alpha]_D^{21} = 23.1$  ( $c = 0.009$  g/mL); **HPLC analysis**: Chiralpak OC column, 90:10 hexanes/iso-propanol, 1.0 mL/min. Major: 40.0 min, minor: 37.8 min.  $^1\text{HNMR}$ : (400 MHz, Chloroform- $d$ )  $\delta$  7.25 (d,  $J = 3.1$  Hz, 1H), 7.23 – 7.12 (m, 4H), 6.59 (dd,  $J = 10.7, 1.6$  Hz, 1H), 5.90 – 5.80 (m, 1H), 4.86 – 4.63 (m, 3H), 4.57 (dd,  $J = 8.1, 4.4$  Hz, 1H), 3.66 (s, 3H), 3.48 – 3.40 (m, 1H), 3.20 (td,  $J = 7.1, 4.4$  Hz, 2H), 2.66 – 2.57 (m, 2H), 2.37 (dd,  $J = 17.3, 7.0$  Hz, 1H), 2.23 – 2.15 (m, 3H), 2.06 – 1.94 (m, 2H), 1.70 (d,  $J = 12.7$  Hz, 4H);  $^{13}\text{CNMR}$ : (101 MHz, Chloroform- $d$ )  $\delta$  173.55, 144.01, 142.19, 140.81, 129.14, 128.37, 125.77, 123.61, 121.49, 113.57, 109.19, 103.32, 79.47, 52.42, 51.60, 42.01, 41.30, 37.92, 36.15, 35.65, 33.82, 33.62, 32.97, 32.46, 22.18; **IR** (ATR, neat) 3061, 3026, 2925, 2857, 1731, 1672, 1625, 1588, 1414, 1170  $\text{cm}^{-1}$ ; **LRMS** (ESI + APCI)  $m/z$  [M+H] calcd 365.2, found 365.2

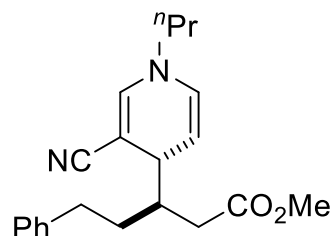

**methyl 3-(3-cyano-1-propyl-1,4-dihydropyridin-4-yl)-5-phenylpentanoate (3f)**: Pale yellow oil. 46% yield, 3:1 rr, 3:1 dr, 88% ee.  $R_f = 0.3$  (4:1 Hexanes:EtOAc);  $[\alpha]_D^{21} = -34.0$  ( $c = 0.01$  g/mL); **HPLC analysis**: Chiralpak IA column, 90:10 hexanes/iso-propanol, 1.0 mL/min. Major: 13.0 min, minor: 11.7 min.  **$^1\text{H NMR}$** : (400 MHz, Chloroform- $d$ )  $\delta$  7.33 – 7.27 (m, 1H), 7.23 – 7.11 (m, 3H), 6.63 (d,  $J = 1.6$  Hz, 1H), 5.90 – 5.80 (m, 1H), 4.60 – 4.53 (m, 1H), 3.66 (s, 3H), 3.48 – 3.40 (m, 1H), 3.08 – 2.98 (m, 2H), 2.67 – 2.56 (m, 2H), 2.48 – 2.30 (m, 2H), 2.08 – 1.92 (m, 2H), 1.57 – 1.49 (m, 2H), 0.86 (t,  $J = 7.4$  Hz, 3H);  **$^{13}\text{C NMR}$** : (101 MHz;  $\text{CDCl}_3$ )  $\delta$  173.56, 144.17, 142.17, 129.31, 128.34, 123.61, 121.59, 101.85, 79.13, 55.86, 51.60, 42.02, 41.29, 36.19, 35.65, 33.78, 32.89, 23.14, 10.79; **IR** (ATR, neat) 3061, 3026, 2930, 2876, 2190, 1731, 1671, 1587, 1414, 1133  $\text{cm}^{-1}$  **LRMS** (ESI + APCI)  $m/z$   $[M+H]$  calcd 339.2, found 339.2.

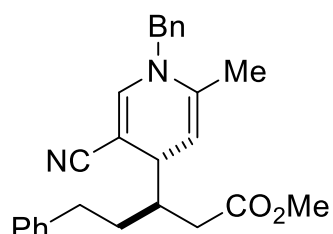

**methyl 3-(1-benzyl-5-cyano-2-methyl-1,4-dihydropyridin-4-yl)-5-phenylhexanoate (3g)**: Pale yellow oil. 46% yield, >20:1 rr, 4:1 dr, 91% ee.  $R_f = 0.3$  (4:1 Hexanes:EtOAc);  $[\alpha]_D^{21} = -11.6$  ( $c = 0.01$  g/mL); **HPLC analysis**: Chiralpak IA column, 90:10 hexanes/iso-propanol, 1.0 mL/min. Major: 15.0 min, minor: 13.6 min.  **$^1\text{H NMR}$** : (400 MHz, Chloroform- $d$ )  $\delta$  7.36 – 7.27 (m, 3H), 7.26 – 7.14 (m, 6H), 7.11 (dd,  $J = 6.5, 3.1$  Hz, 1H), 6.73 (s, 1H), 4.53 – 4.32 (m, 3H), 3.67 (s, 3H), 3.51 – 3.42 (m, 1H), 2.78 – 2.58 (m, 3H), 2.40 (dd,  $J = 7.0, 2.5$  Hz, 1H), 2.16 – 1.95 (m, 2H), 1.75 (s, 3H), 1.65 – 1.51 (m, 1H);  **$^{13}\text{C NMR}$** : (101 MHz, Chloroform- $d$ )  $\delta$  173.57, 145.89, 142.27, 137.40, 135.40, 128.42, 128.38, 127.76, 125.99, 121.20, 101.60, 81.05, 53.98, 51.61, 41.81, 37.40, 35.81, 33.94, 33.20, 18.72; **IR** (ATR, neat) 3061, 3027, 2922, 2853, 2191, 1731, 1679, 1603, 1435, 1407, 1179, 1155  $\text{cm}^{-1}$ ; **LRMS** (ESI + APCI)  $m/z$   $[M+H]$  calcd 401.2, found 401.2.

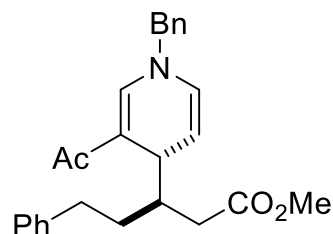

**methyl 3-(3-acetyl-1-benzyl-1,4-dihydropyridin-4-yl)-5-phenylpentanoate (3h)**: Pale yellow oil. 46% yield, 4:1 rr, 5:1 dr, 50% ee.  $R_f = 0.2$  (4:1 Hexanes:EtOAc);  $[\alpha]_D^{21} = -52.7$  ( $c = 0.008$  g/mL); **HPLC analysis**: Chiralpak IA column, 93:7 hexanes/iso-propanol, 1.0 mL/min. Major: 71.8 min, minor: 78.2.  **$^1\text{H NMR}$** : (500 MHz,

Chloroform-d)  $\delta$  7.3a2 – 7.27 (m, 4H), 7.24 – 7.21 (m, 3H), 7.16 (d,  $J$  = 6.7 Hz, 4H), 5.98 (d,  $J$  = 7.8 Hz, 1H), 4.96 – 4.87 (m, 1H), 4.41 (s, 2H), 3.71 (s, 3H), 2.70 – 2.54 (m, 2H), 2.34 (d,  $J$  = 7.3 Hz, 2H), 2.19 (s, 4H), 2.10 (dd,  $J$  = 10.2, 6.0 Hz, 1H), 1.80 – 1.63 (m, 3H), 1.52 – 1.39 (m, 1H);  $^{13}\text{C NMR}$ : (126 MHz;  $\text{CDCl}_3$ ):  $\delta$  195.27, 173.97, 143.48, 142.86, 136.52, 129.20, 128.94, 128.39, 128.30, 128.00, 127.02, 125.61, 111.66, 106.15, 58.01, 51.55, 40.87, 36.00, 33.92, 32.64, 24.65; **IR** (ATR, neat) 3026, 2923, 2856, 1730, 1667, 1574, 1454, 1434, 1387, 1177  $\text{cm}^{-1}$ . **LRMS** (ESI + APCI)  $m/z$   $[M+H]$  calcd 404.2, found 404.3

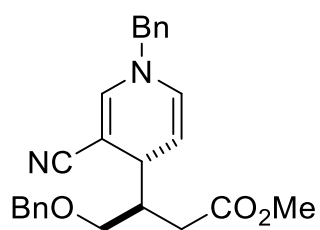

**methyl 3-(1-benzyl-3-cyano-1,4-dihydropyridin-4-yl)-4-(benzyloxy)butanoate (3i)**: Pale yellow oil. 63% yield, 3:1 rr, 4:1 dr, 81% ee.  $R_f$  = 0.3 (4:1 Hexanes:EtOAc);  $[\alpha]_D^{21}$  = -8.0 ( $c$  = 0.005 g/mL); **HPLC analysis**: Chiralpak IA column, 95:5 hexanes/iso-propanol, 1.0 mL/min. Major: 35.6 min, minor: 44.2 min.  **$^1\text{H NMR}$** : (400 MHz, Chloroform-d)  $\delta$  7.33 (q,  $J$  = 4.1, 3.5 Hz, 9H), 7.24 – 7.21 (m, 2H), 7.18 – 7.15 (m, 2H), 6.71 (d,  $J$  = 1.6 Hz, 1H), 6.05 – 5.97 (m, 1H), 5.87 (d,  $J$  = 8.9 Hz, 1H), 4.62 (dd,  $J$  = 8.0, 4.6 Hz, 1H), 4.28 (s, 2H), 3.67 (s, 3H), 3.60 (s, 3H), 3.55 – 3.51 (m, 2H), 3.51 – 3.46 (m, 1H), 2.69 – 2.62 (m, 1H), 2.45 – 2.39 (m, 2H), 2.38 – 2.33 (m, 1H);  **$^{13}\text{C NMR}$** : (101 MHz;  $\text{CDCl}_3$ ):  $^{13}\text{C NMR}$  (101 MHz, Chloroform-d)  $\delta$  173.31, 148.32, 144.17, 138.34, 135.97, 129.05, 128.26, 127.70, 127.22, 123.34, 121.40, 110.04, 104.09, 73.10, 70.42, 68.08, 57.89, 57.57, 56.76, 51.55, 42.64, 39.52, 34.24, 33.23, 31.23, 29.68; **IR** (ATR, neat) 3062, 3030, 2950, 2855, 2193, 1732, 1625, 1453, 1246, 1103  $\text{cm}^{-1}$ ; **LRMS** (ESI + APCI)  $m/z$   $[M+H]$  calcd 403.2, found 403.2

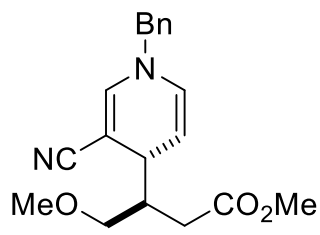

**methyl 3-(1-benzyl-3-cyano-1,4-dihydropyridin-4-yl)-4-methoxybutanoate (3j)**: Pale yellow oil. 63% yield, 5:1 rr, 2:1 dr, 84% ee.  $R_f$  = 0.2 (4:1 Hexanes:EtOAc);  $[\alpha]_D^{21}$  = -33.6 ( $c$  = 0.005 g/mL); **HPLC analysis**: Chiralpak IA column, 80:20 hexanes/iso-propanol, 1.0 mL/min. Major: 8.1 min, minor: 9.8 min.  **$^1\text{H NMR}$** : (400 MHz, Chloroform-d)  $\delta$  7.36 (dt,  $J$  = 13.0, 6.8 Hz, 5H), 7.18 (d,  $J$  = 6.6 Hz, 2H), 6.72 (d,  $J$  = 1.6 Hz, 1H), 5.89 (d,  $J$  = 8.0 Hz, 1H), 4.63 (dd,  $J$  = 8.1, 4.5 Hz, 1H), 4.30 (s, 2H), 3.69 (t,  $J$  = 4.2 Hz, 2H), 3.65 (s, 2H), 3.55 (dd,  $J$  = 9.6, 6.6 Hz, 1H), 3.52 – 3.48 (m, 1H), 3.37 (dd,  $J$  = 9.6, 7.4 Hz, 1H), 3.31 (s, 2H), 2.43 – 2.35 (m, 1H), 2.25 (dd,  $J$  = 6.9, 3.2 Hz, 1H);  **$^{13}\text{C NMR}$** : (101 MHz, Chloroform-d)  $\delta$  173.35, 148.35, 144.19, 135.98, 129.29, 129.05, 128.29, 127.23, 123.36, 121.37, 104.12, 79.78, 72.63, 58.77, 58.35, 57.60, 51.58, 42.59, 41.01, 39.46, 34.15, 33.03, 31.45, 31.14; **IR** (ATR, neat) 2950, 2925, 2192, 1730, 1672, 1589, 1413, 1179, 1118  $\text{cm}^{-1}$ . **LRMS** (ESI + APCI)  $m/z$   $[M+H]$  calcd 327.2, found 327.2

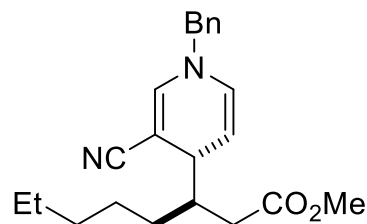

**methyl 3-(1-benzyl-3-cyano-1,4-dihydropyridin-4-yl)octanoate**

**(3k)**: Pale yellow oil. 63% yield, 4:1 rr, 3:1 dr, 84% ee.  $R_f = 0.2$  (4:1 Hexanes:EtOAc);  $[\alpha]_D^{21} = -23.7$  ( $c = 0.01$  g/mL); **HPLC analysis**: Chiralpak IA column, 90:10 hexanes/iso-propanol, 1.0 mL/min. Major: 6.4 min, minor: 5.8 min.  **$^1\text{H NMR}$** : (400 MHz, Chloroform- $d$ )  $\delta$  7.40 – 7.29 (m, 3H), 7.22 – 7.16 (m, 2H), 6.70 (d,  $J = 1.6$  Hz, 1H), 5.87 (d,  $J = 8.8$  Hz, 1H), 4.60 (dd,  $J = 8.2, 4.4$  Hz, 1H), 4.28 (s, 2H), 3.65 (s, 3H), 3.38 (t,  $J = 3.7$  Hz, 1H), 2.30 (dd,  $J = 7.2, 2.9$  Hz, 2H), 1.99 – 1.91 (m, 1H), 1.69 – 1.60 (m, 1H), 1.38 – 1.16 (m, 9H), 0.92 – 0.85 (m, 4H);  **$^{13}\text{C NMR}$** : (101 MHz, Chloroform- $d$ )  $\delta$  173.70, 161.51, 144.08, 136.18, 128.99, 128.19, 127.16, 122.89, 121.22, 110.47, 103.75, 102.63, 92.89, 80.85, 57.52, 55.30, 51.53, 41.78, 36.39, 35.60, 33.30, 32.01, 30.77, 28.49, 27.00, 22.55, 14.06; **IR** (ATR, neat) 2952, 2927, 2856, 2192, 1731, 1673, 1591, 1411, 1204, 1151  $\text{cm}^{-1}$ ; **LRMS** (ESI + APCI)  $m/z$   $[M+H]$  calcd 353.2, found 353.3

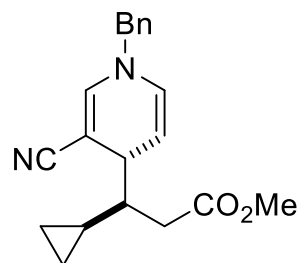

**methyl 3-(1-benzyl-3-cyano-1,4-dihydropyridin-4-yl)-3-**

**cyclopropylpropanoate (3l)**: Pale yellow oil. 31% yield, 3:1 rr, 3:1 dr, 85% ee.  $R_f = 0.4$  (4:1 Hexanes:EtOAc);  $[\alpha]_D^{21} = -60.0$  ( $c = 0.01$  g/mL); **HPLC analysis**: Chiralpak IA column, 90:10 hexanes/iso-propanol, 1.0 mL/min. Major: 14.3 min, minor: 16.2 min.  **$^1\text{H NMR}$** : (400 MHz, Chloroform- $d$ )  $\delta$  7.35 (d,  $J = 7.1$  Hz, 4H), 7.21 – 7.17 (m, 2H), 6.71 (d,  $J = 1.6$  Hz, 1H), 5.91 (d,  $J = 10.2$  Hz, 1H), 4.62 (dd,  $J = 8.1, 4.6$  Hz, 1H), 4.29 (s, 3H), 3.66 – 3.64 (m, 3H), 3.46 – 3.41 (m, 1H), 2.42 (dd,  $J = 24.9, 7.4$  Hz, 3H), 1.24 – 1.17 (m, 1H), 0.94 – 0.82 (m, 2H), 0.50 – 0.47 (m, 1H), 0.45 – 0.41 (m, 1H), 0.32 (dt,  $J = 9.0, 4.5$  Hz, 1H), 0.08 (tt,  $J = 9.5, 4.6$  Hz, 2H);  **$^{13}\text{C NMR}$** : (101 MHz;  $\text{CDCl}_3$ ):  $\delta$  173.59, 148.79, 144.05, 136.16, 128.98, 127.19, 123.45, 121.54, 110.13, 81.01, 59.04, 47.88, 45.35, 37.85, 36.50, 34.53, 13.18, 11.62, 4.58, 3.57; **IR** (ATR, neat) 3064, 3002, 2923, 2851, 2192, 1673, 1591, 1437, 1414, 1245, 1180  $\text{cm}^{-1}$ ; **LRMS** (ESI + APCI)  $m/z$   $[M+H]$  calcd 323.2, found 323.2

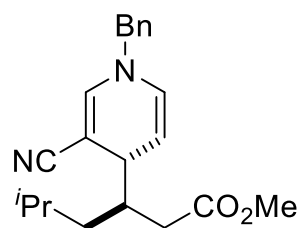

**methyl 3-(1-benzyl-3-cyano-1,4-dihydropyridin-4-yl)-5-**

**methylhexanoate (3m)**: Pale yellow oil. 52% yield, 3:1 rr, 2:1 dr, 58% ee.  $R_f = 0.2$  (4:1 Hexanes:EtOAc);  $[\alpha]_D^{21} = -18.9$  ( $c = 0.010$  g/mL); **HPLC analysis**: Chiralpak IE column, 90:10 hexanes/iso-propanol, 1.0 mL/min. Major: 38.1 min, minor: 33.8 min.  **$^1\text{H NMR}$** : (400 MHz,

Chloroform-d)  $\delta$  7.35 (dq,  $J = 11.9, 6.6, 5.2$  Hz, 4H), 7.21 – 7.19 (m, 1H), 6.71 (d,  $J = 1.6$  Hz, 1H), 5.88 (d,  $J = 8.2$  Hz, 1H), 4.60 (dd,  $J = 8.1, 4.3$  Hz, 1H), 4.28 (s, 2H), 3.66 (d,  $J = 6.9$  Hz, 3H), 3.38 (s, 1H), 2.28 (t,  $J = 6.9$  Hz, 2H), 1.60 (ddd,  $J = 19.8, 14.2, 6.6$  Hz, 2H), 1.49 – 1.43 (m, 1H), 1.18 – 1.07 (m, 1H), 0.91 (d,  $J = 6.5$  Hz, 6H);  $^{13}\text{CNMR}$ : (101 MHz, Chloroform-d)  $\delta$  173.60, 161.51, 148.80, 136.20, 129.59, 129.42, 128.99, 128.20, 127.22, 127.14, 122.98, 121.13, 103.61, 102.61, 92.90, 57.53, 55.31, 51.53, 40.04, 39.21, 36.33, 35.74, 25.19, 23.30, 22.10; **IR** (ATR, neat) 2926, 2867, 2193, 1733, 1674, 1593, 1454, 1206, 1194, 1152  $\text{cm}^{-1}$  **LRMS** (ESI + APCI)  $m/z$  [M+H] calcd 339.2, found 339.2

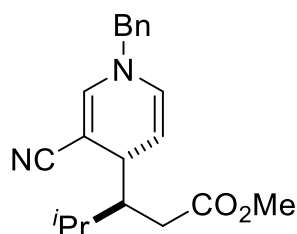

**methyl (S)-3-((S)-1-benzyl-3-cyano-1,4-dihydropyridin-4-yl)-4-methylpentanoate (3n)**: Pale yellow oil. 54% yield, 5:1 rr, 3:1 dr, 42% ee.  $R_f = 0.2$  (4:1 Hexanes:EtOAc);  $[\alpha]_D^{21} = 0.5699$  ( $c = 0.011$  g/mL); **HPLC analysis**: Chiralpak IA column, 90:10 hexanes/iso-propanol, 1.0 mL/min. Major: 14.6 min, minor: 10.2 min.  $^1\text{HNMR}$ : (500 MHz, Chloroform-d)  $\delta$  7.46 – 7.32 (m, 8H), 7.23 (q,  $J = 8.2, 7.0$  Hz, 4H), 6.67 (d,  $J = 1.5$  Hz, 1H), 5.91 – 5.85 (m, 1H), 4.59 (dd,  $J = 8.2, 4.3$  Hz, 1H), 4.31 (d,  $J = 3.9$  Hz, 3H), 3.68 (s, 3H), 3.54 (t,  $J = 3.7$  Hz, 1H), 3.36 (d,  $J = 5.9$  Hz, 1H), 2.60 (dd,  $J = 15.8, 5.8$  Hz, 1H), 2.37 – 2.31 (m, 1H), 1.94 (qd,  $J = 7.1, 3.2$  Hz, 1H), 1.77 – 1.69 (m, 2H), 0.96 (dd,  $J = 6.6, 5.1$  Hz, 8H);  $^{13}\text{CNMR}$ : (126 MHz, Chloroform-d)  $\delta$  174.40, 143.73, 136.06, 129.61, 129.03, 128.24, 127.92, 127.30, 120.88, 102.91, 82.59, 57.44, 51.56, 47.66, 35.24, 34.24, 28.80, 20.59; **IR** (ATR, neat) 2958, 2192, 1732, 1672, 1627, 1592, 1367, 1413 1181, 1118, 703  $\text{cm}^{-1}$  **LRMS** (ESI + APCI)  $m/z$  [M+H] calcd 325.4, found 325.1

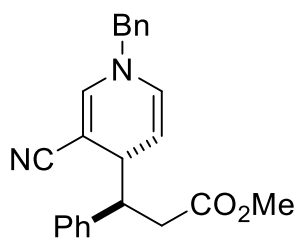

**methyl (R)-3-((S)-1-benzyl-3-cyano-1,4-dihydropyridin-4-yl)-3-phenylpropanoate (3o)**: Pale yellow oil. 40.5 mg, 57% yield, 8:1 rr, 1:1 dr, 24% ee.  $R_f = 0.2$  (4:1 Hexanes:EtOAc);  $[\alpha]_D^{21} = -20.0$  ( $c = 0.017$  g/mL); **HPLC analysis**: Chiralpak IE column, 70:30 hexanes/iso-propanol, 1.0 mL/min. Major: 14.3 min, minor: 16.2 min.  $^1\text{HNMR}$ : (500 MHz, Chloroform-d)  $\delta$  7.42 – 7.29 (m, 12H), 7.28 – 7.24 (m, 3H), 7.21 (d,  $J = 7.2$  Hz, 2H), 7.09 (d,  $J = 6.9$  Hz, 2H), 6.82 (dd,  $J = 6.5, 2.8$  Hz, 2H), 6.68 (d,  $J = 1.5$  Hz, 1H), 6.48 (d,  $J = 1.5$  Hz, 1H), 5.88 (d,  $J = 8.1$  Hz, 1H), 5.78 (d,  $J = 8.1$  Hz, 1H), 4.70 (dd,  $J = 8.1, 4.7$  Hz, 1H), 4.54 (dd,  $J = 8.1, 4.5$  Hz, 1H), 4.26 (s, 2H), 4.12 (s, 2H), 3.61 (dd,  $J = 6.4, 3.8$  Hz, 1H), 3.59 (s, 3H), 3.59 (s, 3H), 3.55 (t,  $J = 4.1$  Hz, 1H), 3.43 – 3.35 (m, 2H), 3.00 – 2.74 (m, 4H);  $^{13}\text{CNMR}$ : (126 MHz, Chloroform-d)  $\delta$  172.91, 172.35, 144.05, 143.71, 139.89, 139.52, 129.76, 129.56, 129.17, 129.06, 128.93, 128.35, 128.26, 128.24, 127.97, 127.95, 127.17, 126.88, 126.80, 121.28, 120.99, 81.11, 57.47, 57.21, 51.70, 51.66, 47.68, 40.22, 39.14, 35.88, 34.92; **IR** (ATR, neat) 3029, 2949,

2910, 2191, 1733, 1673, 1591, 1453, 1413, 1184, 1160, 740, 702  $\text{cm}^{-1}$  **LRMS** (ESI)  $m/z$  [M+H] calcd 359.2, found 359.2

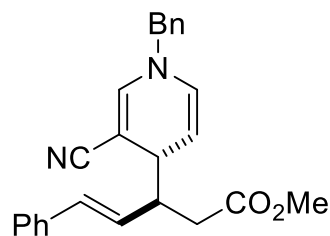

**methyl (S,E)-3-((S)-1-benzyl-3-cyano-1,4-dihydropyridin-4-yl)-5-phenylpent-4-enoate (3p)**: Pale yellow oil. 38% yield, 5:1 rr, 1:1 dr, 24% ee.  $R_f = 0.2$  (4:1 Hexanes:EtOAc);  $[\alpha]_D^{21} = -91.8$  ( $c = 0.006$  g/mL); **HPLC analysis**: Chiralpak IE column, 80:20 hexanes/iso-propanol, 1.0 mL/min. Major: 36.4 min, minor: 32.9 min.  **$^1\text{H}$ NMR**: (500 MHz, Chloroform- $d$ )  $\delta$  7.36 (dd,  $J = 12.3, 7.8$  Hz, 4H), 7.34 – 7.30 (m, 4H), 7.26 (dd,  $J = 7.6, 3.4$  Hz, 2H), 7.21 (d,  $J = 7.8$  Hz, 1H), 7.09 (dd,  $J = 7.5, 2.7$  Hz, 2H), 6.68 (t,  $J = 1.8$  Hz, 1H), 6.18 (dd,  $J = 15.8, 9.4$  Hz, 1H), 5.94 (dt,  $J = 8.2, 2.2$  Hz, 1H), 4.77 – 4.68 (m, 1H), 4.27 (s, 2H), 3.66 (s, 3H), 3.59 (s, 1H), 3.50 (dt,  $J = 12.8, 4.1$  Hz, 1H), 2.90 (dt,  $J = 10.2, 4.7$  Hz, 1H), 2.84 – 2.73 (m, 1H), 2.60 – 2.49 (m, 1H).  **$^{13}\text{C}$ NMR**: (126 MHz, Chloroform- $d$ )  $\delta$  172.46, 143.83, 133.09, 132.32, 129.95, 129.08, 129.02, 128.57, 128.28, 127.36, 127.19, 127.05, 126.50, 103.25, 102.21, 57.53, 51.74, 47.70, 40.23, 39.16, 38.78, 38.45, 35.91; **IR** (ATR, neat) 3026, 2954, 2923, 2856, 2191, 1732, 1672, 1590, 1412, 1182, 747, 701  $\text{cm}^{-1}$  **LRMS** (ESI)  $m/z$  [M+H] calcd 385.2, found 385.

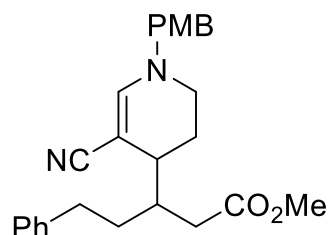

**methyl 3-(5-cyano-1-(4-methoxybenzyl)-1,2,3,4-tetrahydropyridin-4-yl)-5-phenylpentanoate (9)**: Palladium hydroxide on carbon (20 wt%, 14.0 mg, 0.02 mmol) was added to a vial containing dihydropyridine **3i** (42.3 mg, 0.1 mmol) and methanol (2 mL) at room temperature under argon. The vial was then placed under vacuum and back-filled with Argon two times. After removal of the argon atmosphere a third time with vacuum, a hydrogen balloon was placed in the vial and the reaction stirred was stirred for 12 h. After this time, celite is added to the reaction mixture, and the solids were removed by filtration through celite to give 37.4 mg (88%, 3:1 dr, 86% ee) of a yellow oil.  $R_f = 0.2$  (4:1 Hexanes:EtOAc);  $[\alpha]_D^{21} = -35.2$  ( $c = 0.125$  g/mL); **HPLC analysis**: Chiralpak IB column, 85:15 hexanes/iso-propanol, 1.0 mL/min. Major: 31.2 min, minor: 29.0 min.  **$^1\text{H}$ NMR**: (500 MHz, Chloroform- $d$ )  $\delta$  7.32 – 7.27 (m, 2H), 7.23 – 7.17 (m, 3H), 7.14 – 7.09 (m, 2H), 6.98 (dd,  $J = 11.3, 1.2$  Hz, 1H), 6.93 – 6.87 (m, 2H), 4.17 (d,  $J = 7.4$  Hz, 2H), 3.83 (s, 3H), 3.71 (s, 3H), 3.01 (dt,  $J = 12.3, 5.5$  Hz, 2H), 2.74 – 2.63 (m, 2H), 2.57 (dd,  $J = 15.2, 6.3$  Hz, 1H), 2.47 (d,  $J = 7.9$  Hz, 1H), 2.34 – 2.21 (m, 1H);  **$^{13}\text{C}$ NMR**: (101 MHz, Chloroform- $d$ )  $\delta$  173.41, 159.47, 142.24, 128.91, 128.38, 125.84, 122.88, 114.29, 58.95, 55.33, 51.65, 43.85, 38.51, 37.83, 36.73, 35.86, 34.48, 33.98, 29.70, 22.53; **IR** (ATR, neat) 2927, 2855, 2180, 1732, 1617, 1512, 1248, 1175, 1031  $\text{cm}^{-1}$  **LRMS** (ESI)  $m/z$  [M+H] calcd 419.2, found 419.2



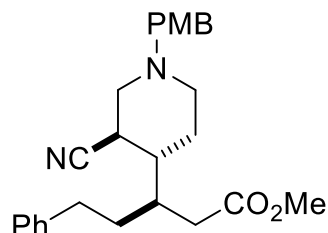

**methyl (R)-3-((3R,4R)-3-cyano-1-(4-methoxybenzyl)piperidin-4-yl)-5-phenylpentanoate (10):** A solution of dihydropyridine **3i** (44.3 mg, 0.11 mmol) in  $\text{CH}_2\text{Cl}_2$  (2 mL) was cooled to  $-10^\circ\text{C}$ , and triethylsilane (340  $\mu\text{L}$ , 20 equiv) was added along with trifluoroacetic acid (204  $\mu\text{L}$ , 25 equiv). This mixture was then allowed to stir while warming to room temperature. After 12 h, volatiles were removed under reduced pressure. The resulting crude oil was purified by column chromatography (DCM/MeOH) to give **10** (51%, 22.8 mg, 0.054 mmol, 3:1 dr, 84% ee) as an off-white solid.  $R_f = 0.2$  (98:2 DCM:MeOH);  $[\alpha]_D^{21} = -37.8$  ( $c = 0.008$  g/mL); **HPLC analysis:** Chiralpak IB column, 85:15 hexanes/iso-propanol, 1.0 mL/min. Major: 10.6 min, minor: 11.6 min.  **$^1\text{H}$ NMR:** (500 MHz, Chloroform- $d$ )  $\delta$  7.34 – 7.26 (m, 4H), 7.22 (d,  $J = 7.3$  Hz, 1H), 7.18 (d,  $J = 7.2$  Hz, 2H), 6.96 (d,  $J = 8.4$  Hz, 2H), 4.11 (dd,  $J = 64.4$ , 13.0 Hz, 2H), 3.85 (s, 3H), 3.70 (s, 3H), 3.57 (d,  $J = 11.6$  Hz, 1H), 3.48 – 3.38 (m, 1H), 2.80 – 2.66 (m, 2H), 2.60 (dt,  $J = 15.2$ , 7.5 Hz, 3H), 2.44 – 2.31 (m, 1H), 2.25 (dd,  $J = 15.2$ , 9.9 Hz, 1H), 1.89 (dd,  $J = 26.0$ , 10.7 Hz, 3H), 1.81 – 1.71 (m, 1H), 1.42 (dtd,  $J = 14.4$ , 9.5, 5.2 Hz, 1H);  **$^{13}\text{C}$ NMR:** (126 MHz, Chloroform- $d$ )  $\delta$  172.46, 140.59, 128.60, 128.25, 126.26, 119.17, 116.76, 114.90, 60.42, 55.43, 51.92, 51.70, 51.51, 39.71, 36.06, 35.90, 33.72, 30.50, 29.07, 21.82; **IR** (ATR, neat) 2925, 1734, 1673, 1612, 1514, 1454, 1251, 1180, 1032, 830  $\text{cm}^{-1}$  **LRMS** (ESI)  $m/z$   $[M+H]$  calcd 421.2, found 421.3

### Proposed stereochemical model to account for selectivity:

Transition state leading to major (*R,S*)-enantiomer:

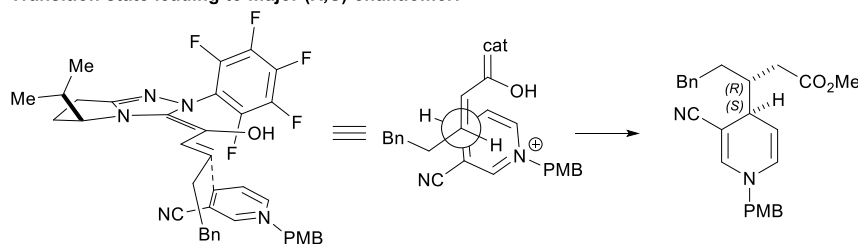

Transition state leading to minor (*S,R*)-enantiomer:

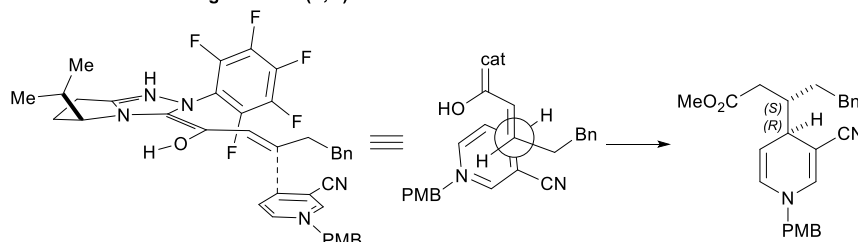



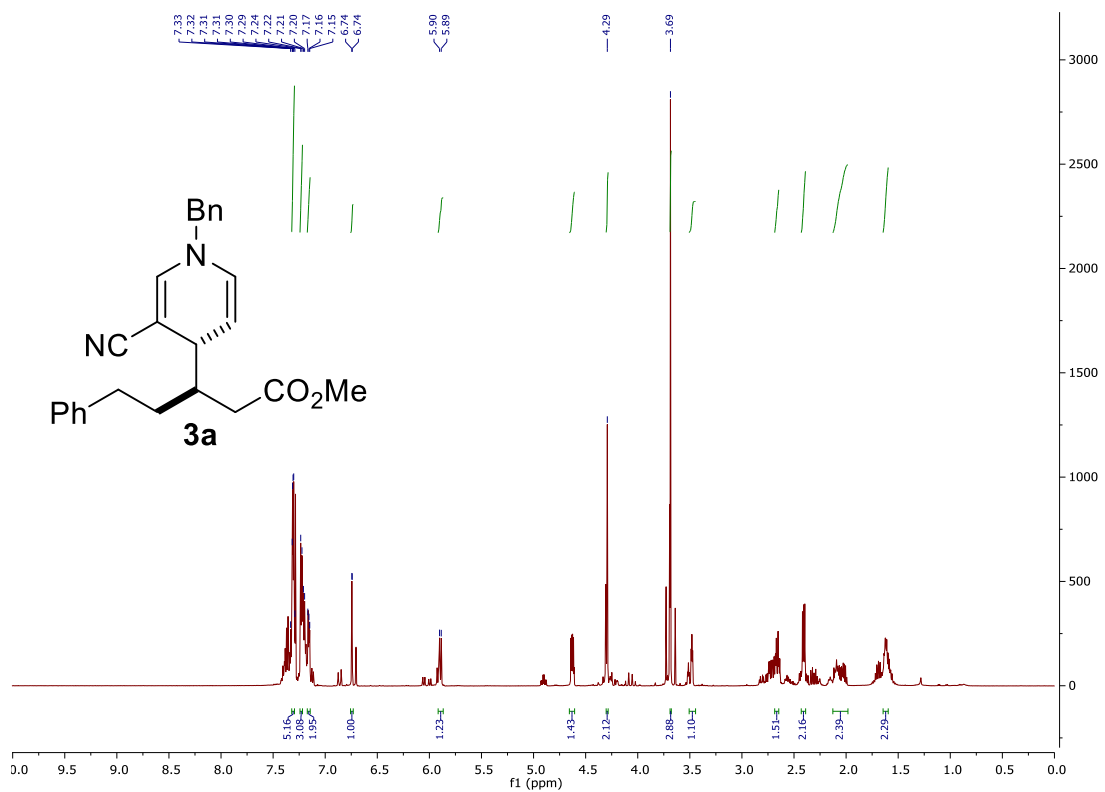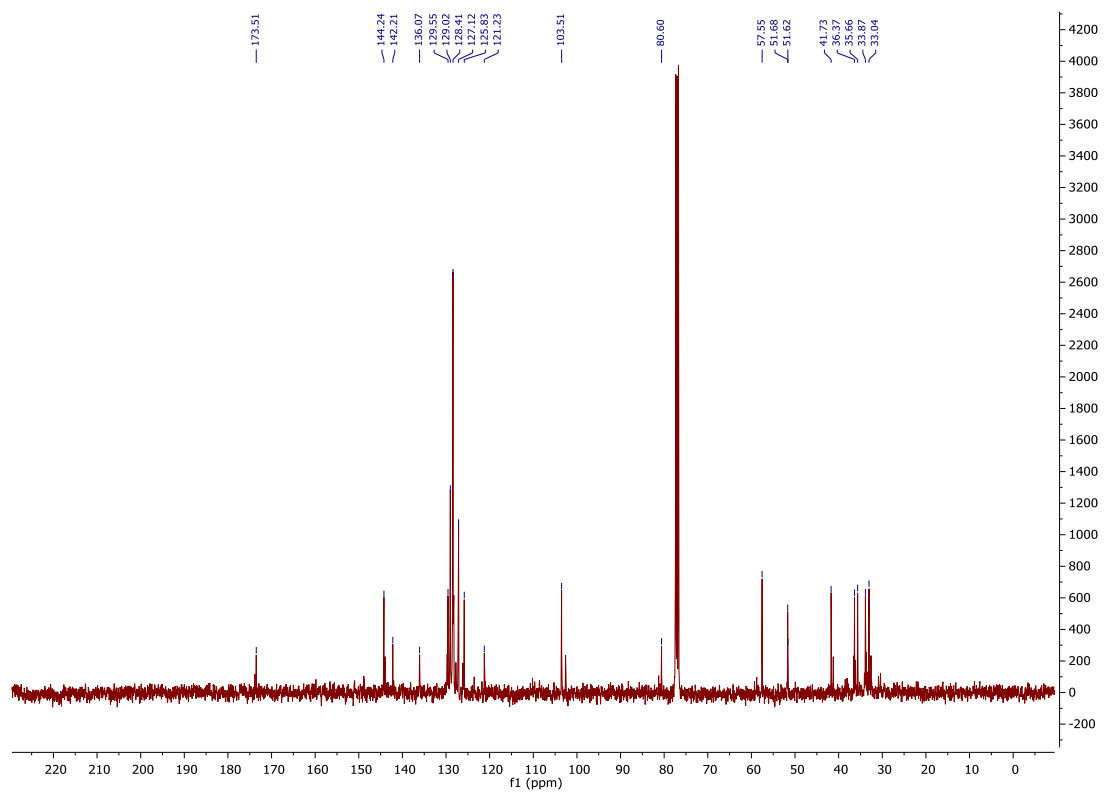

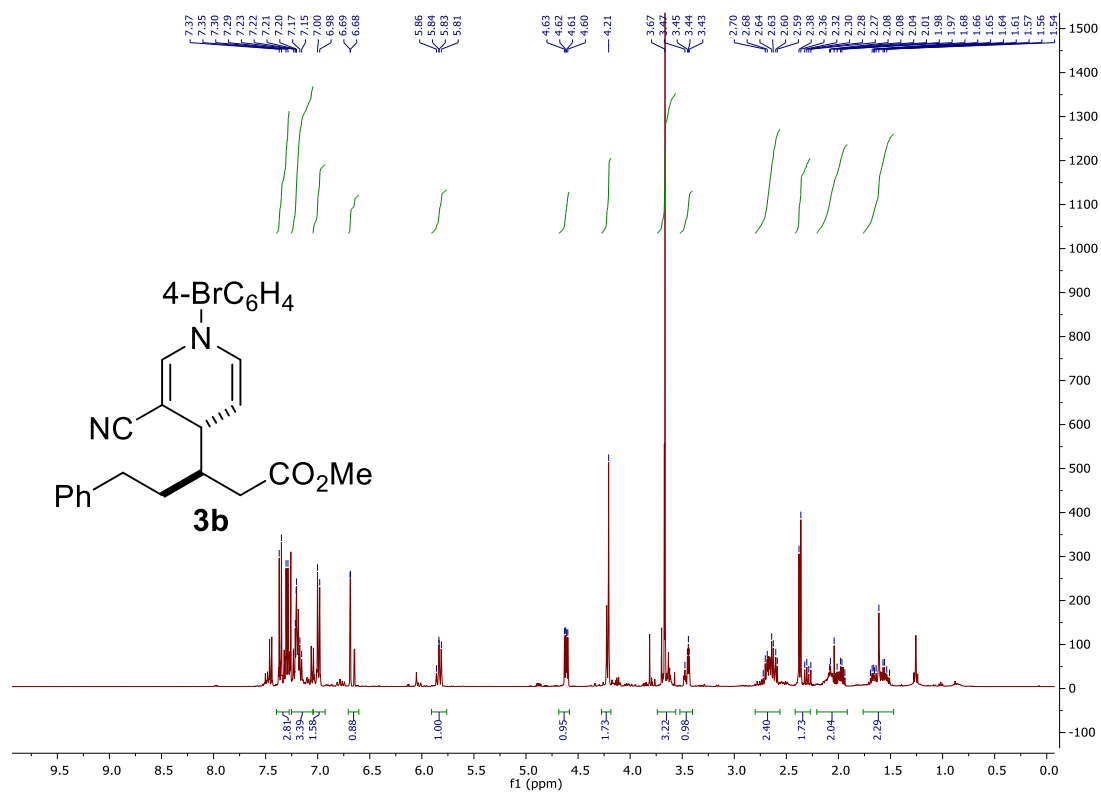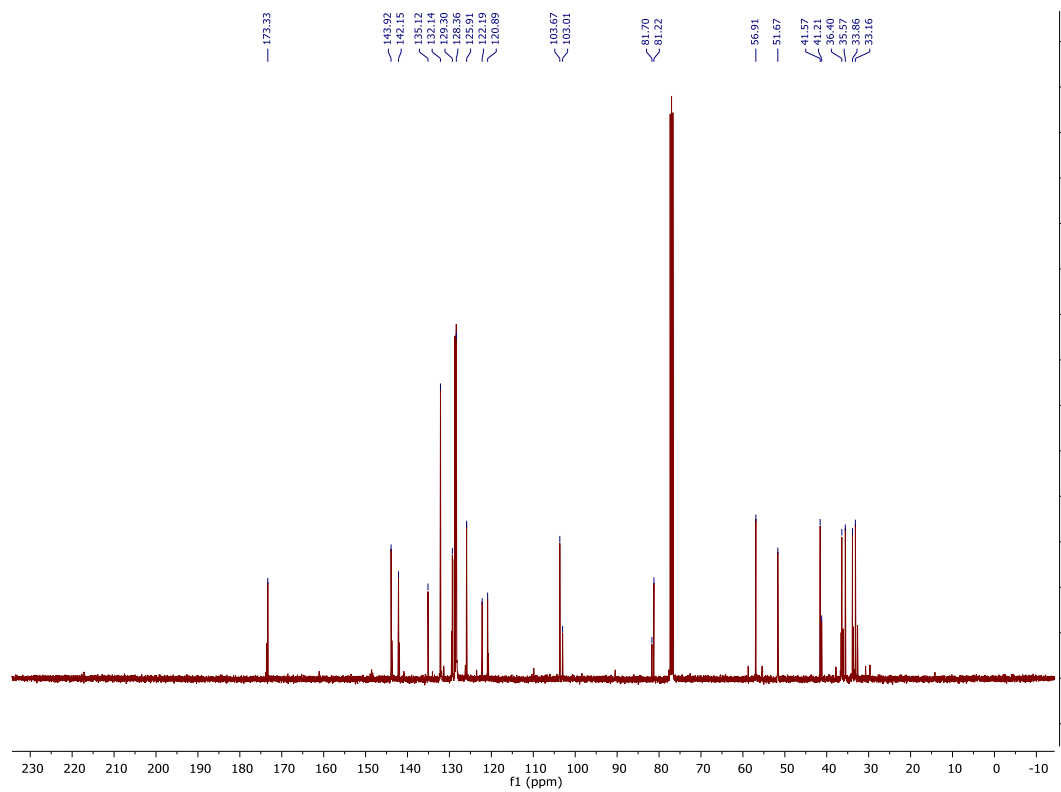

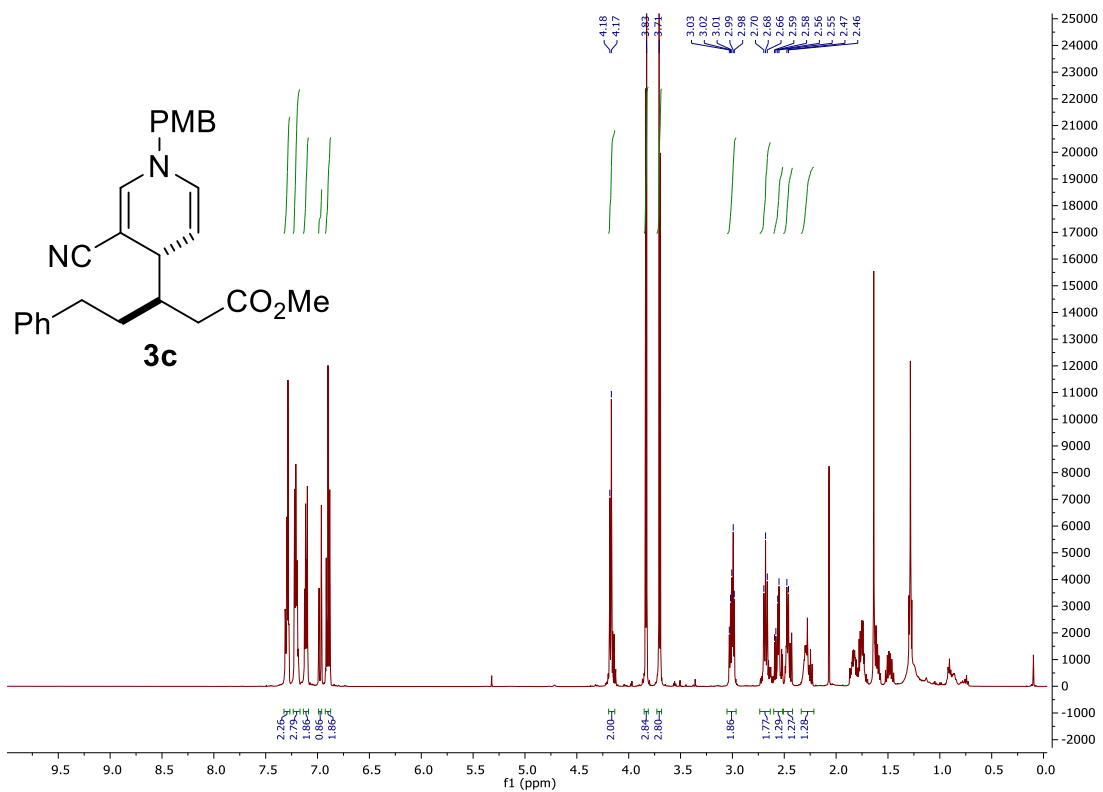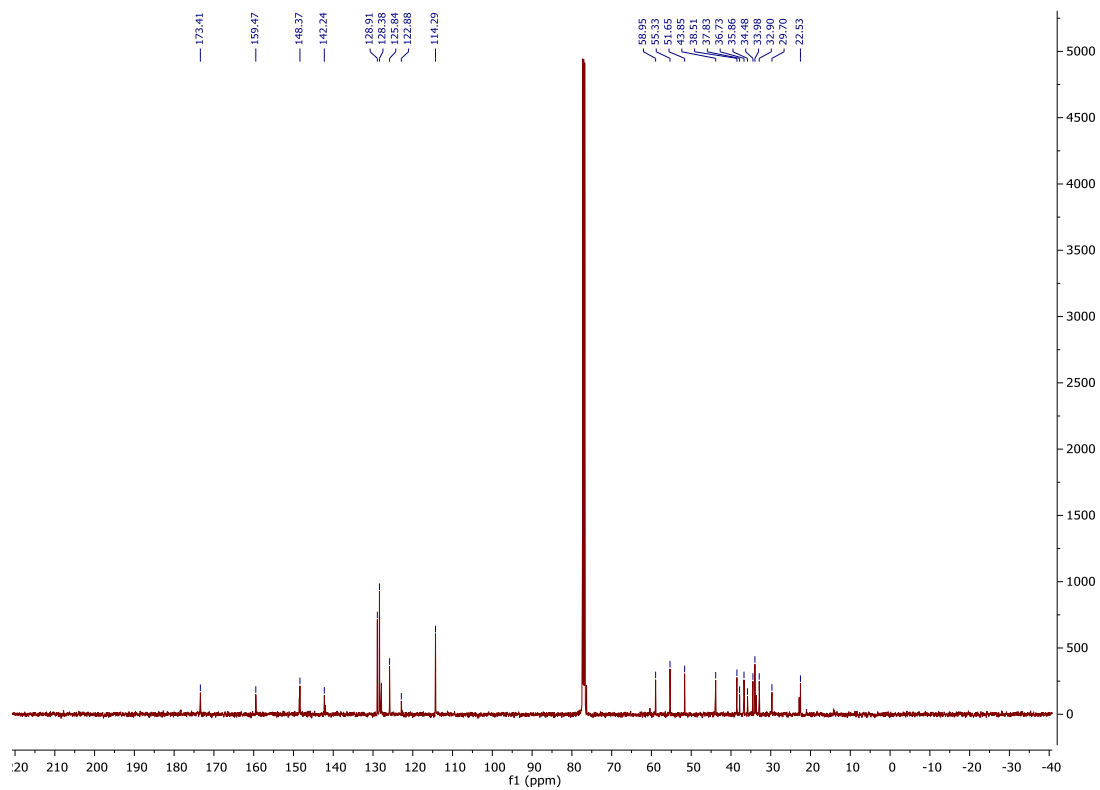

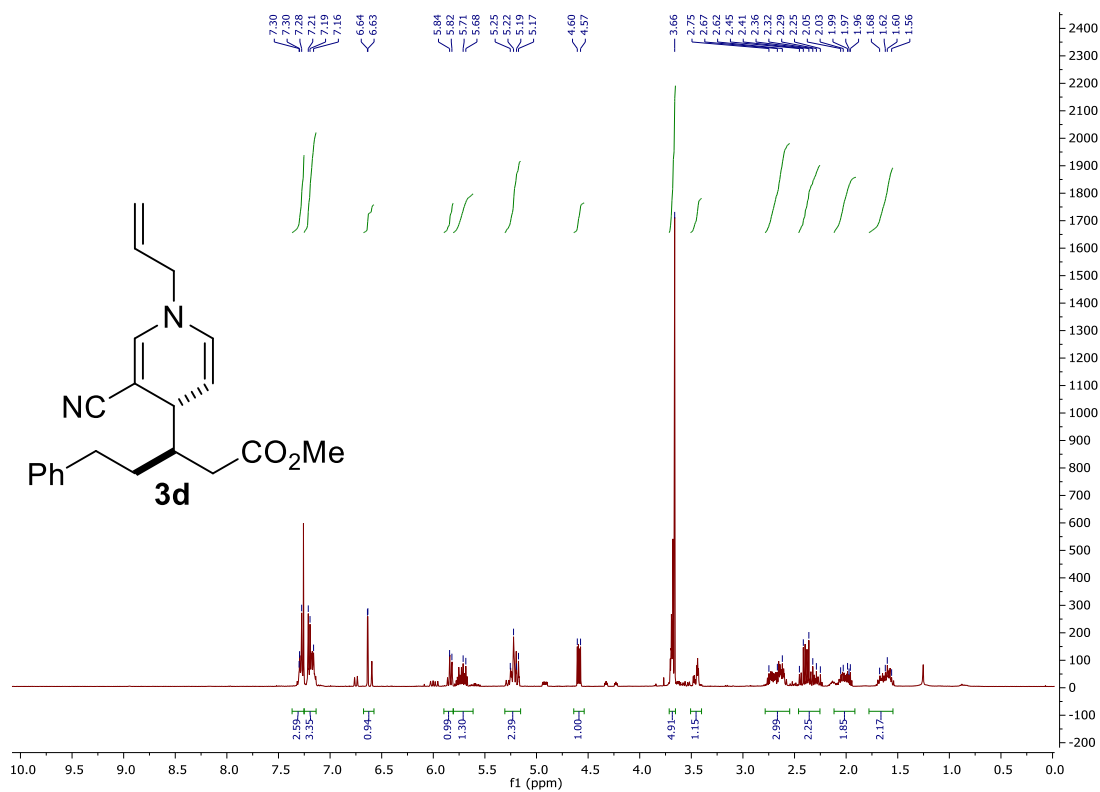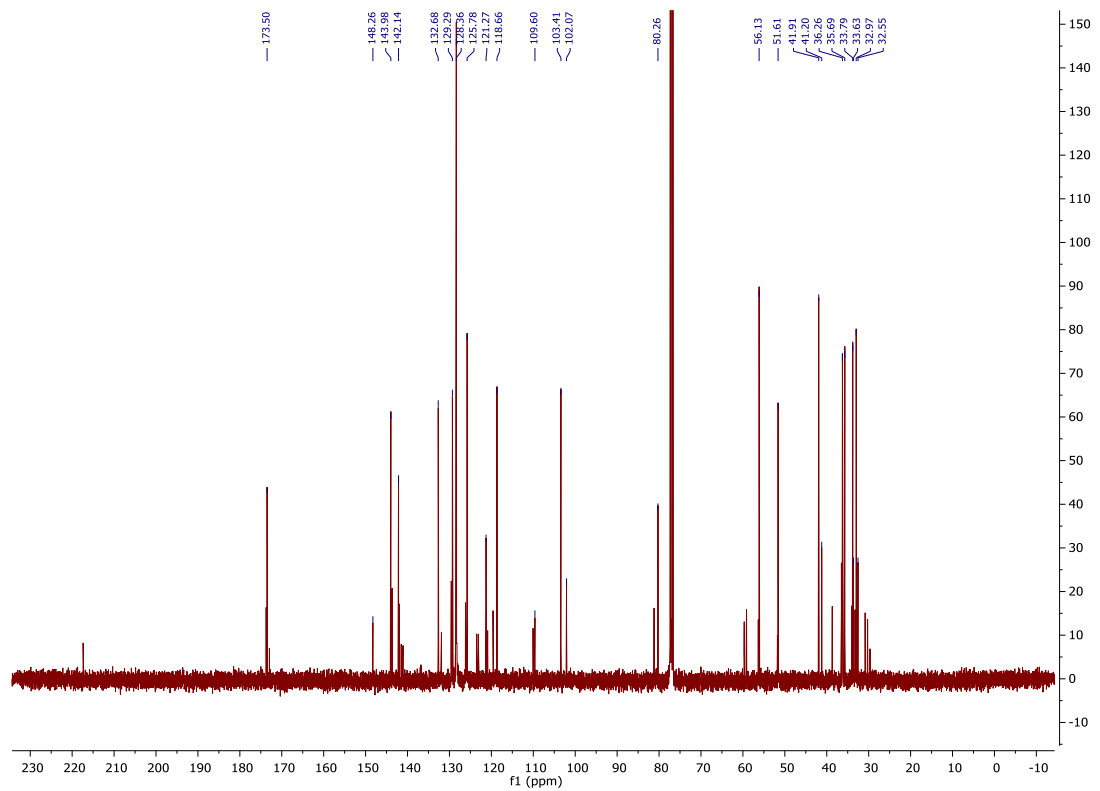

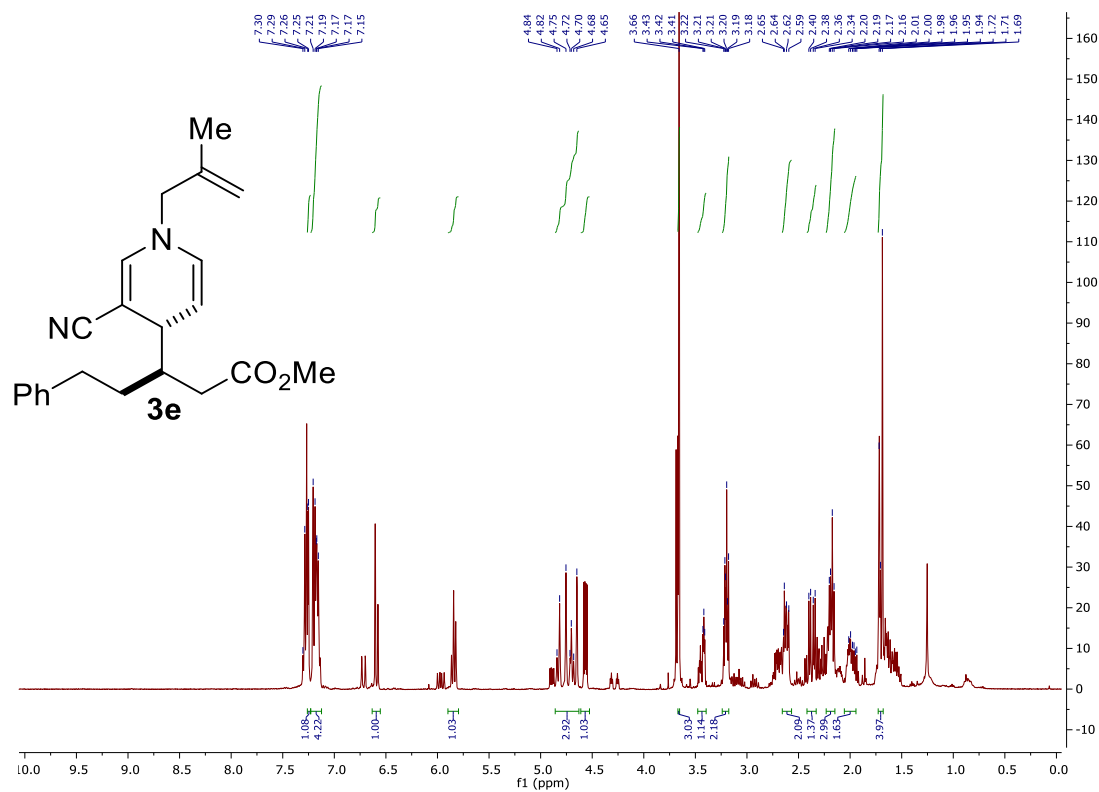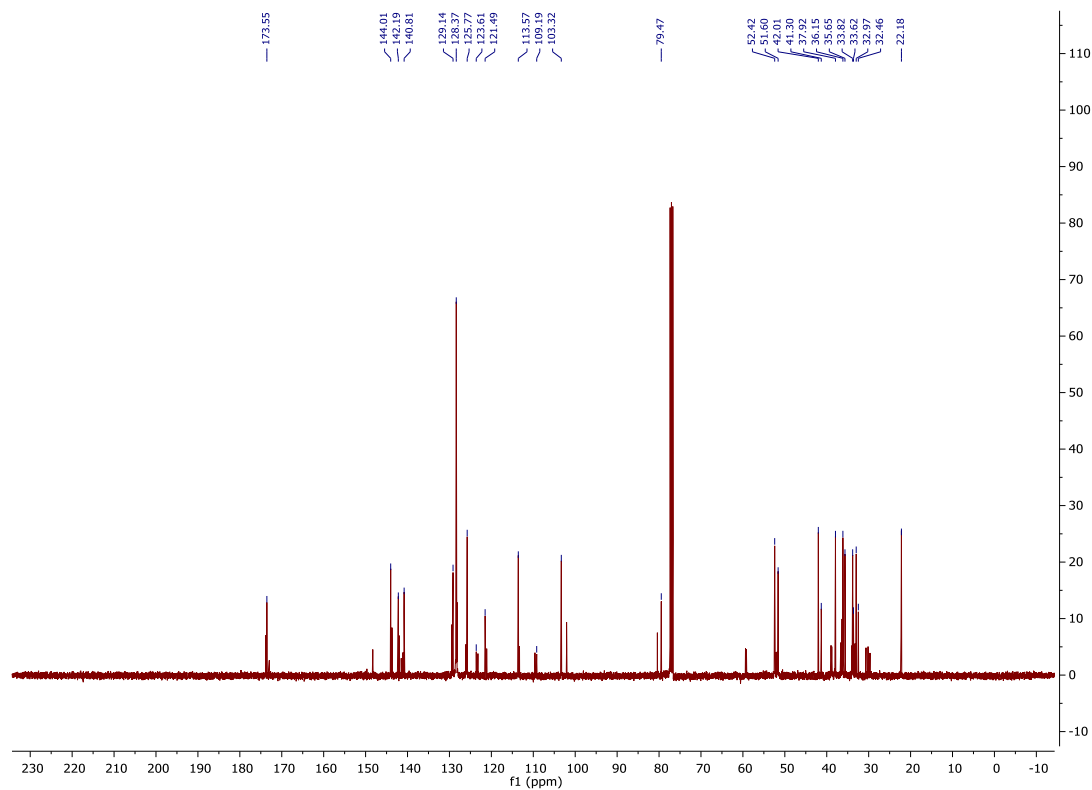

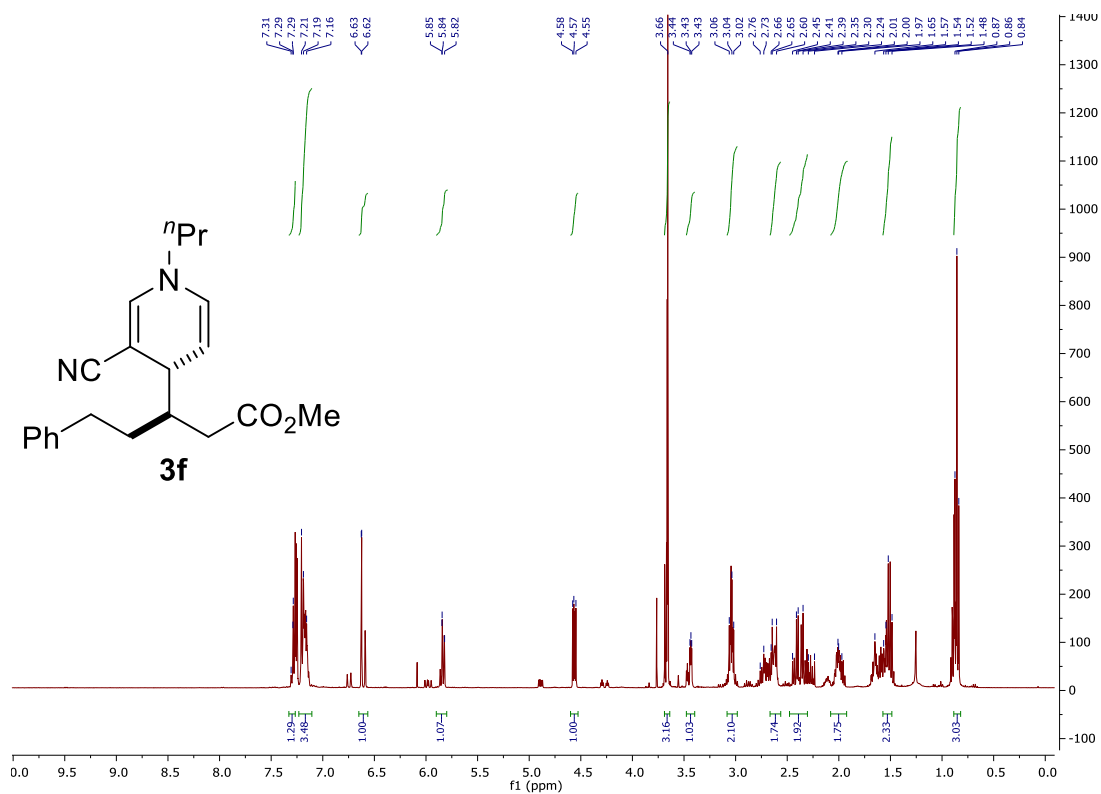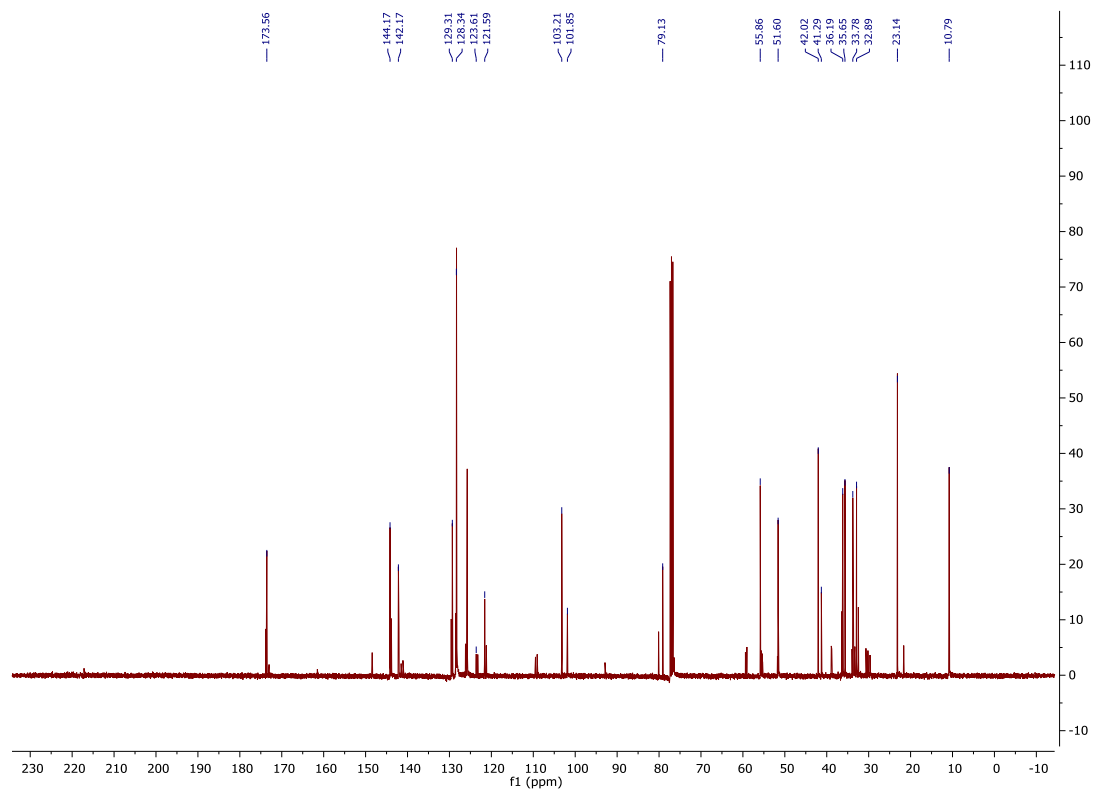



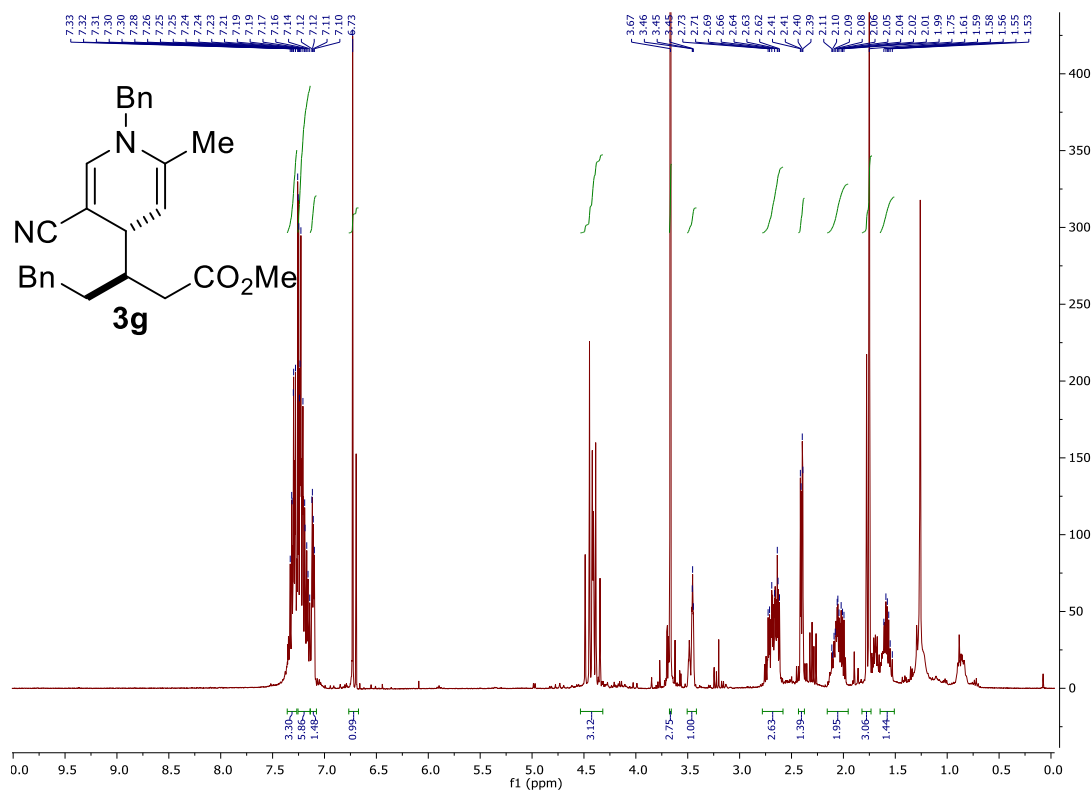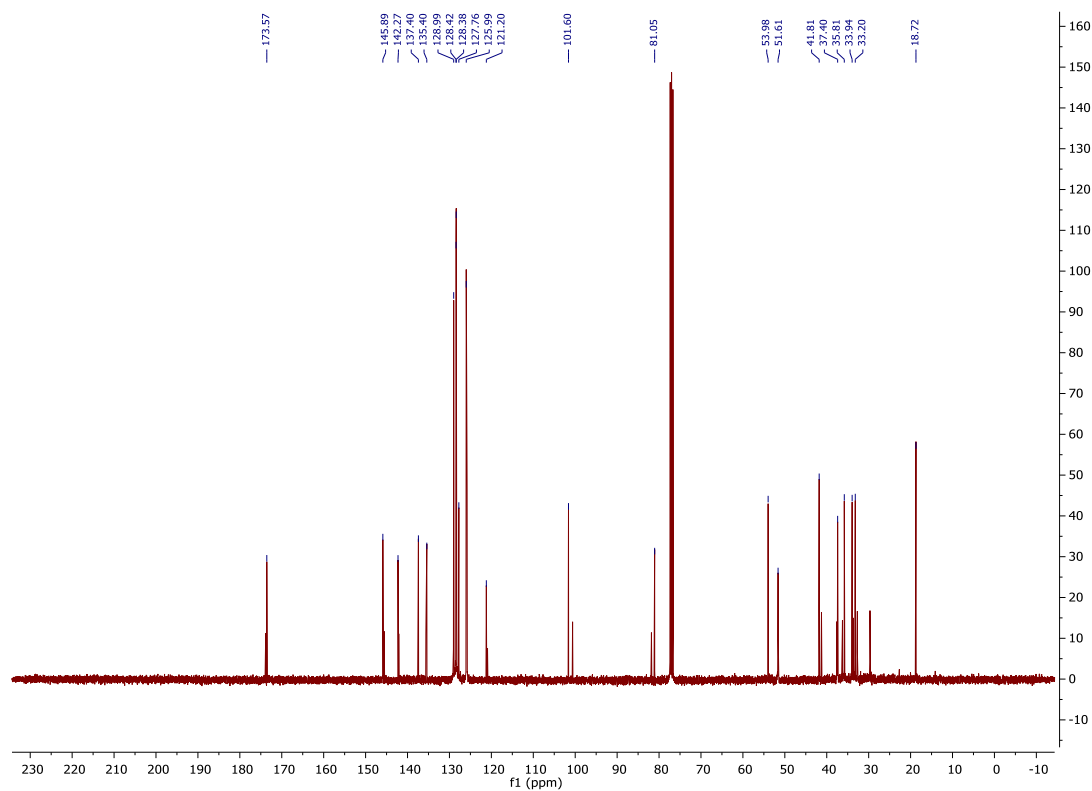

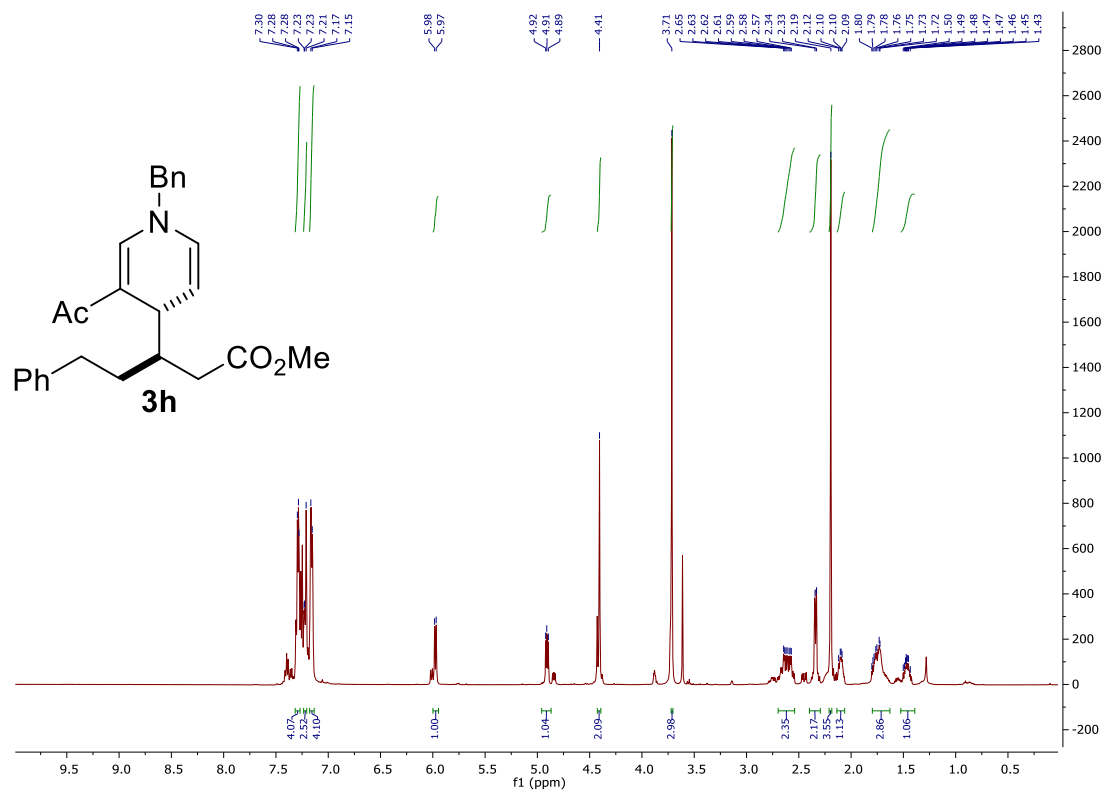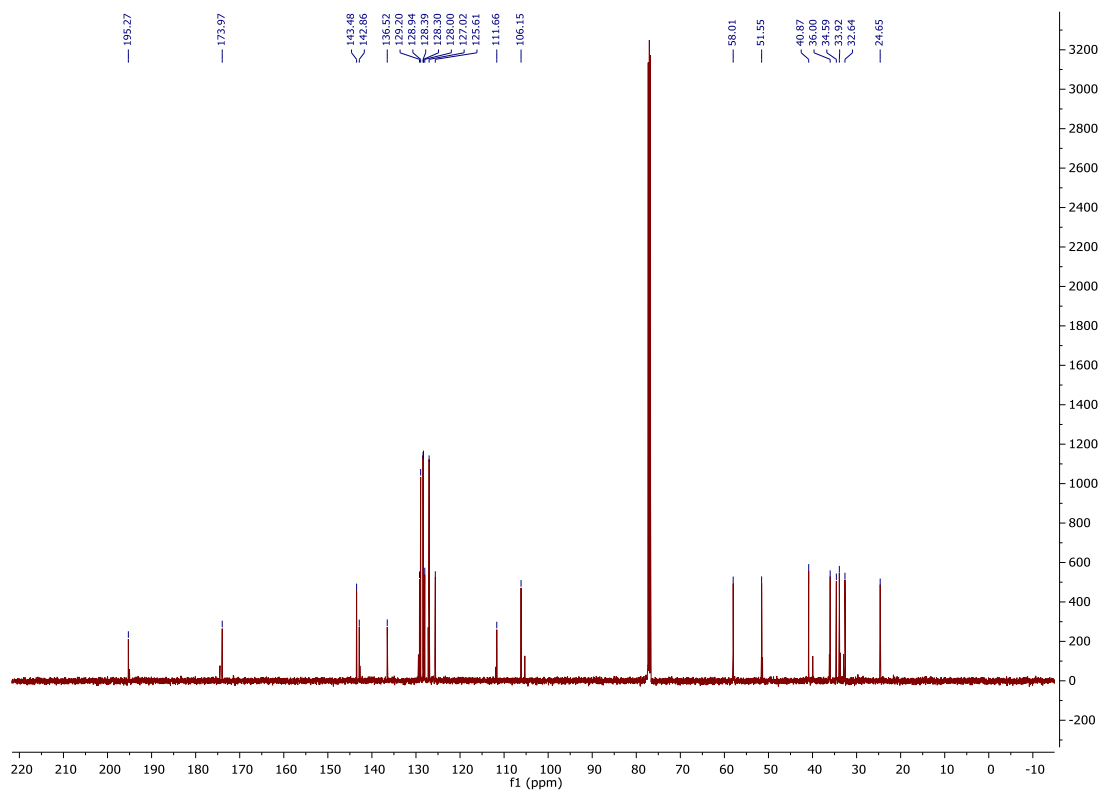

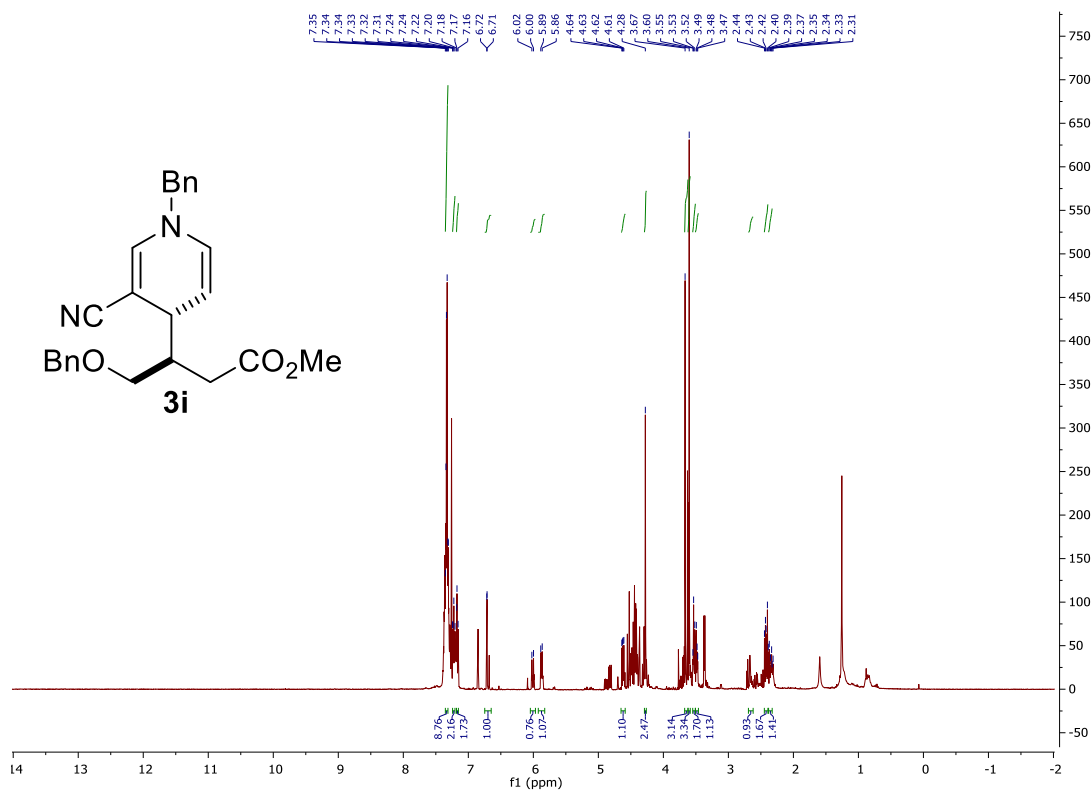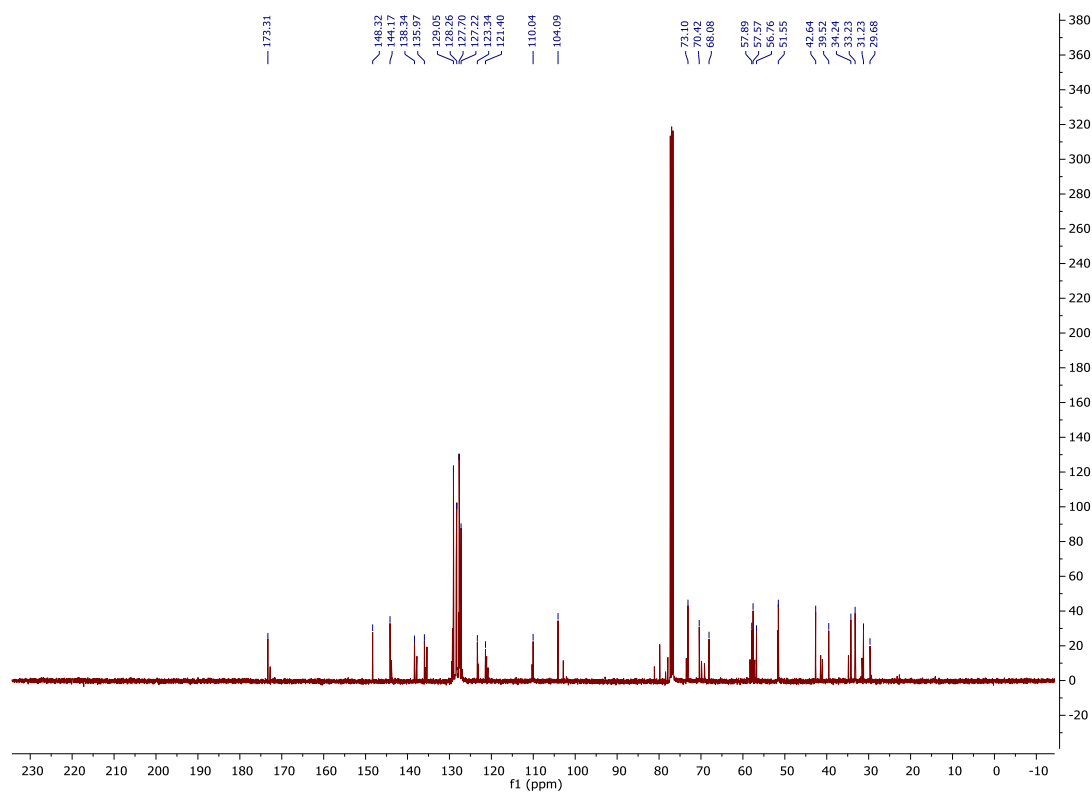

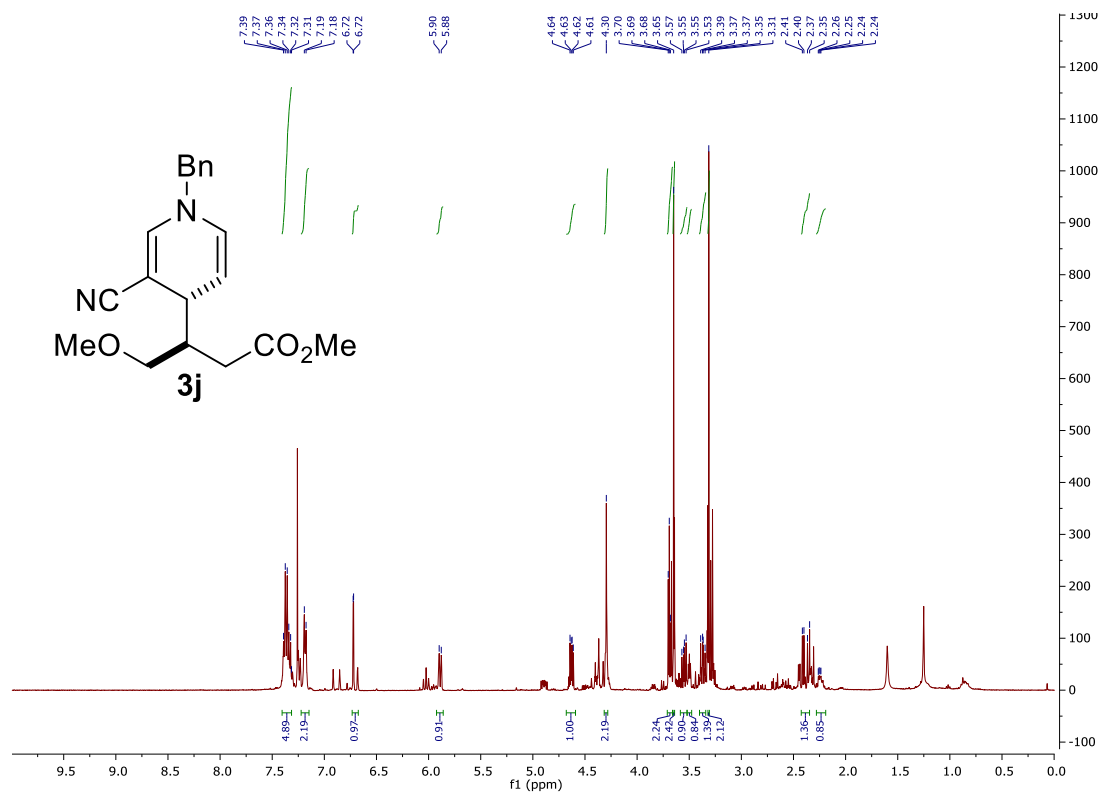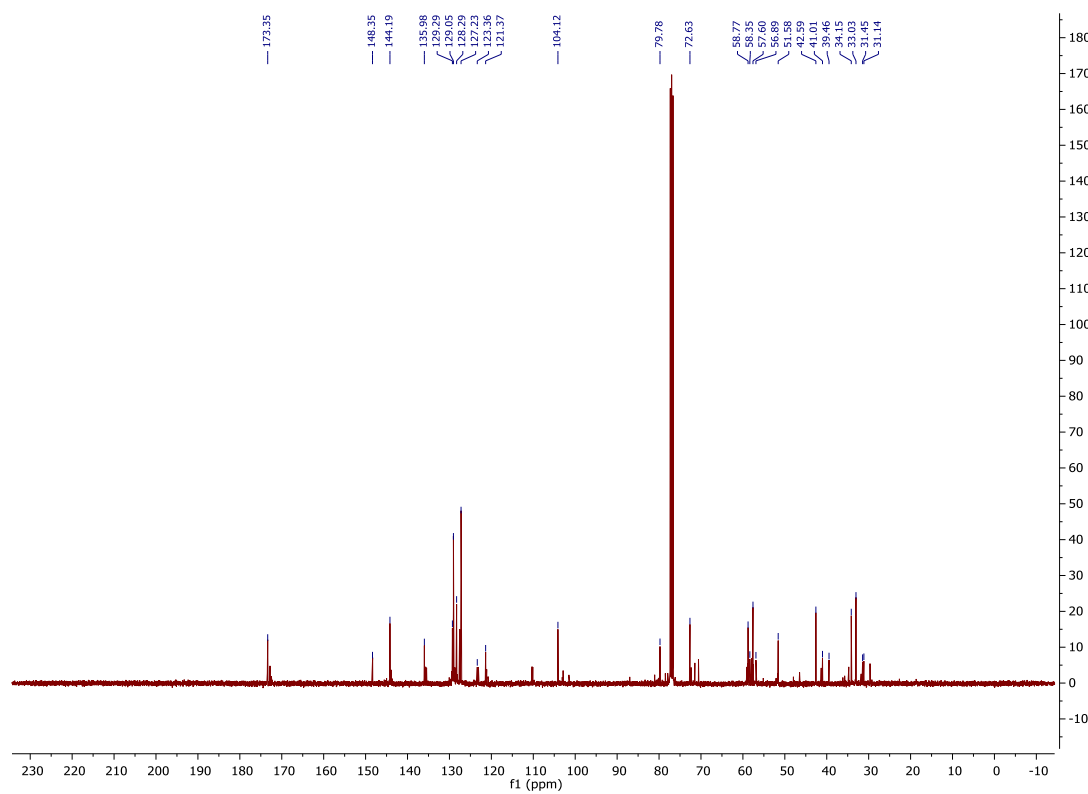

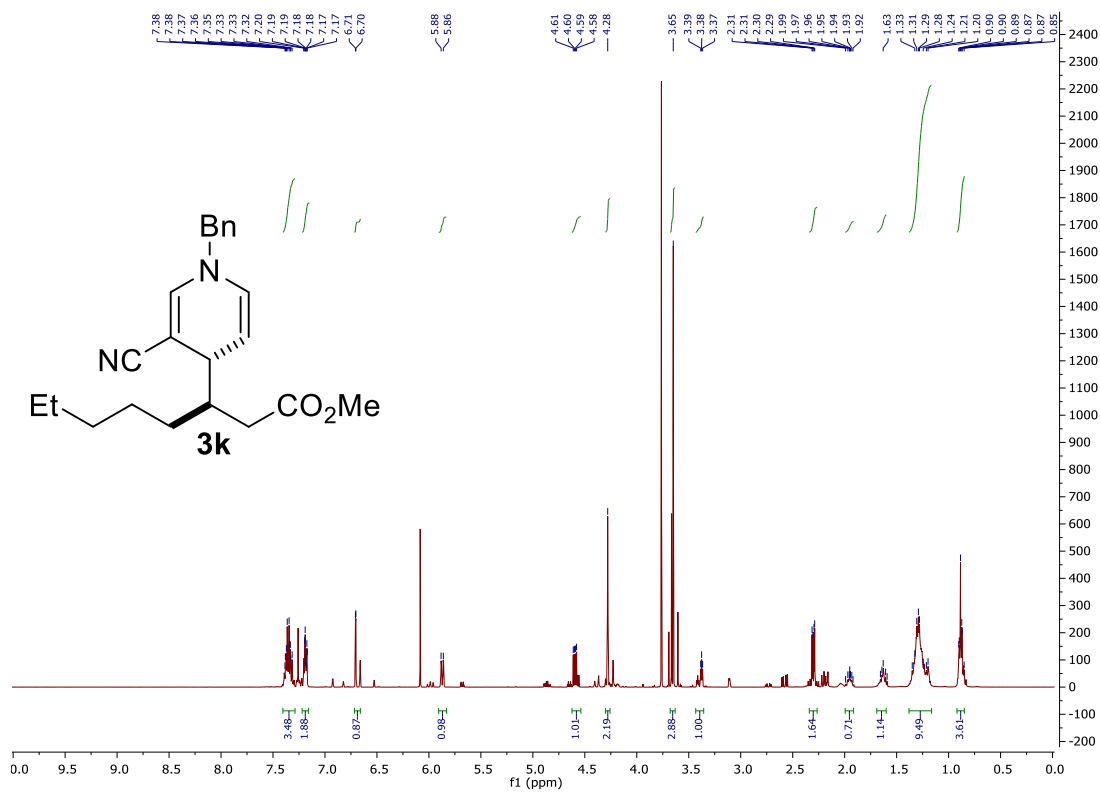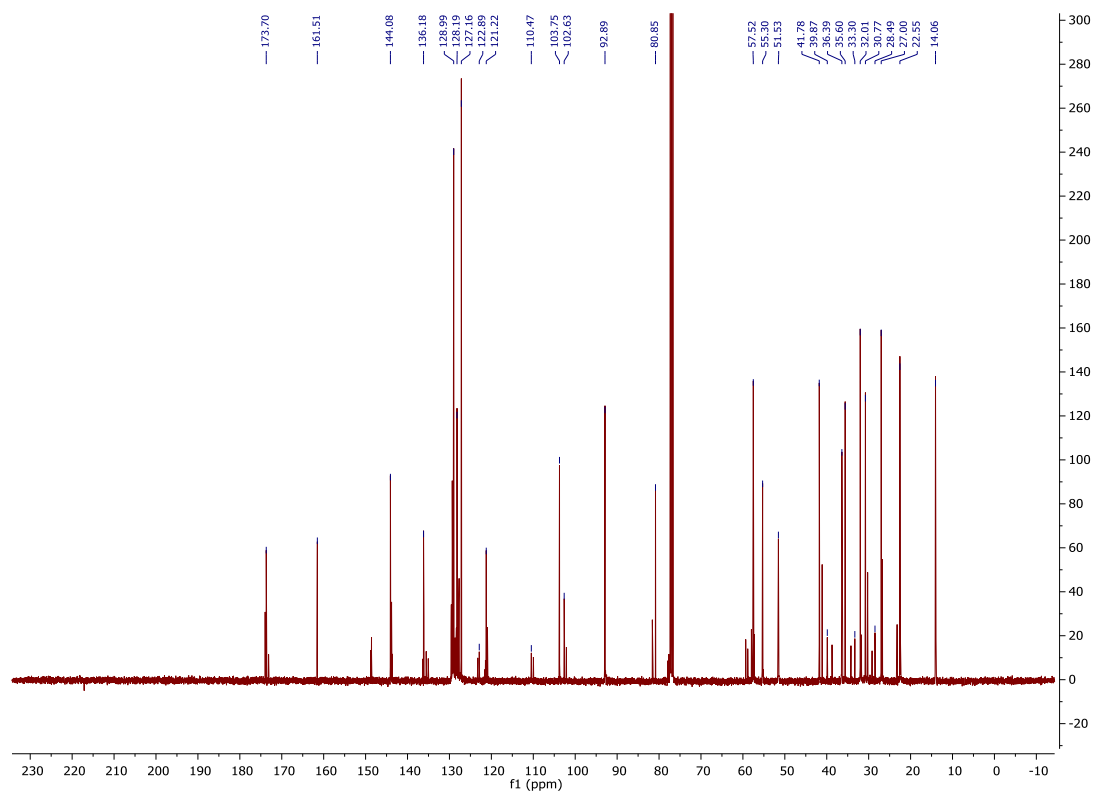

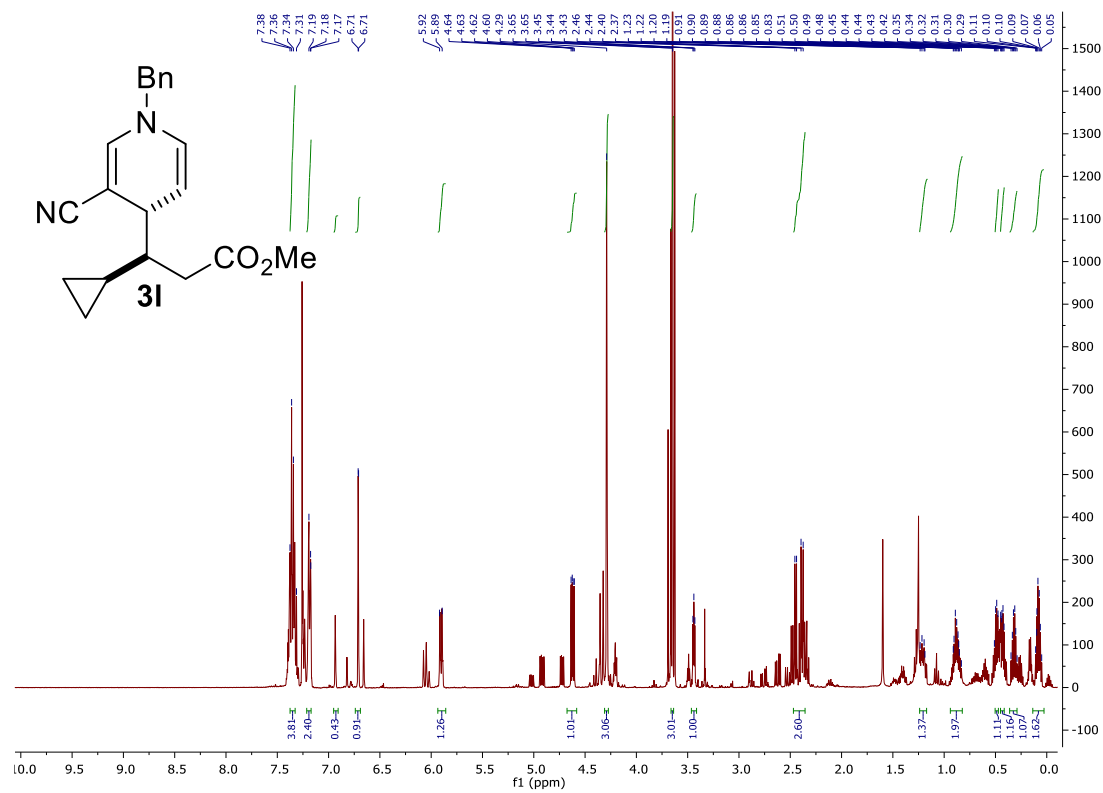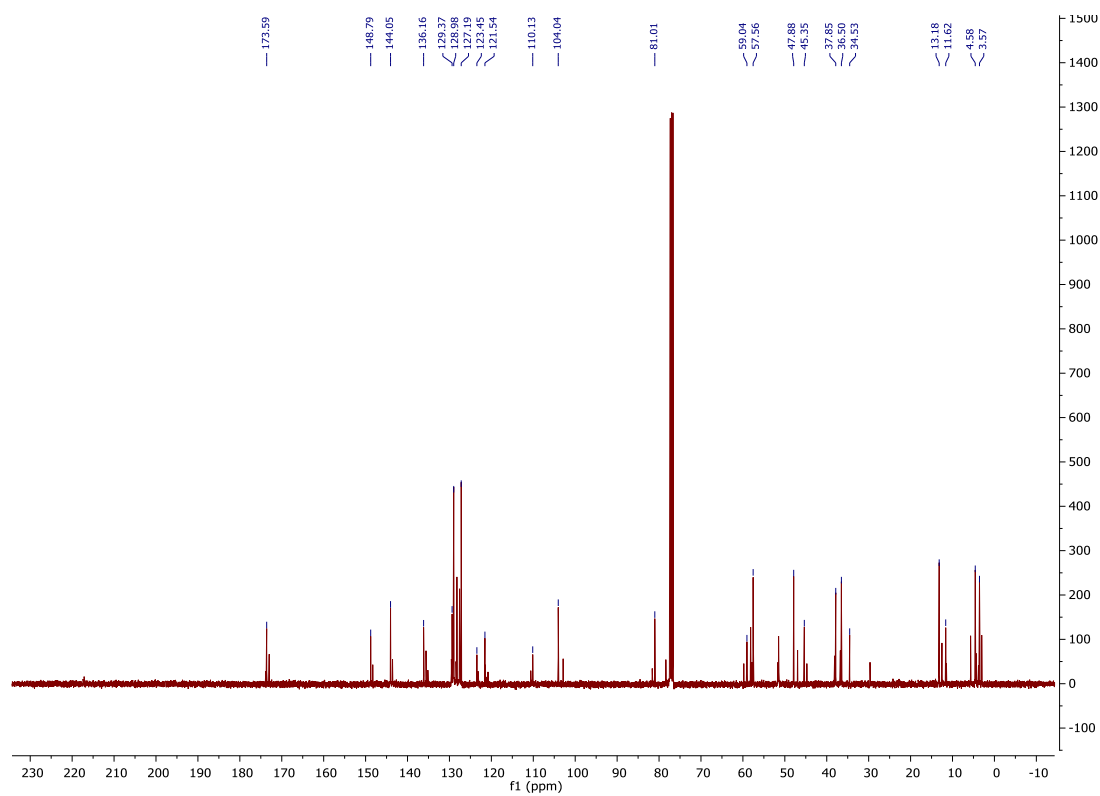

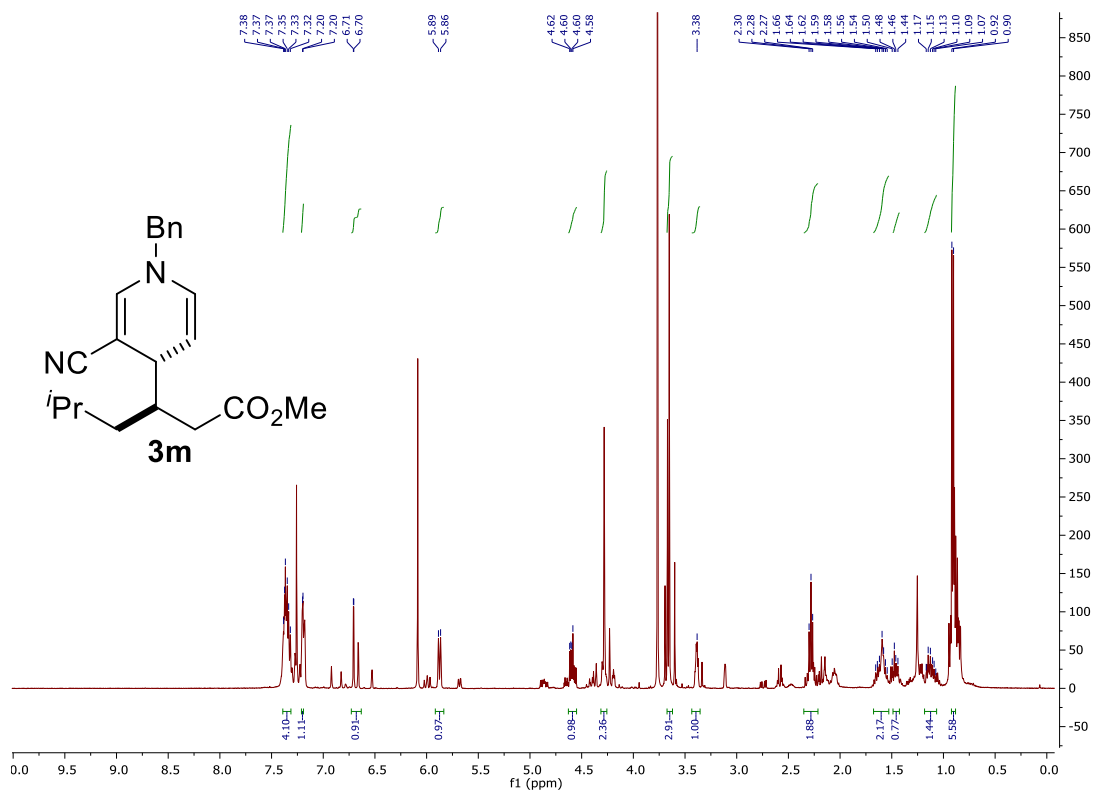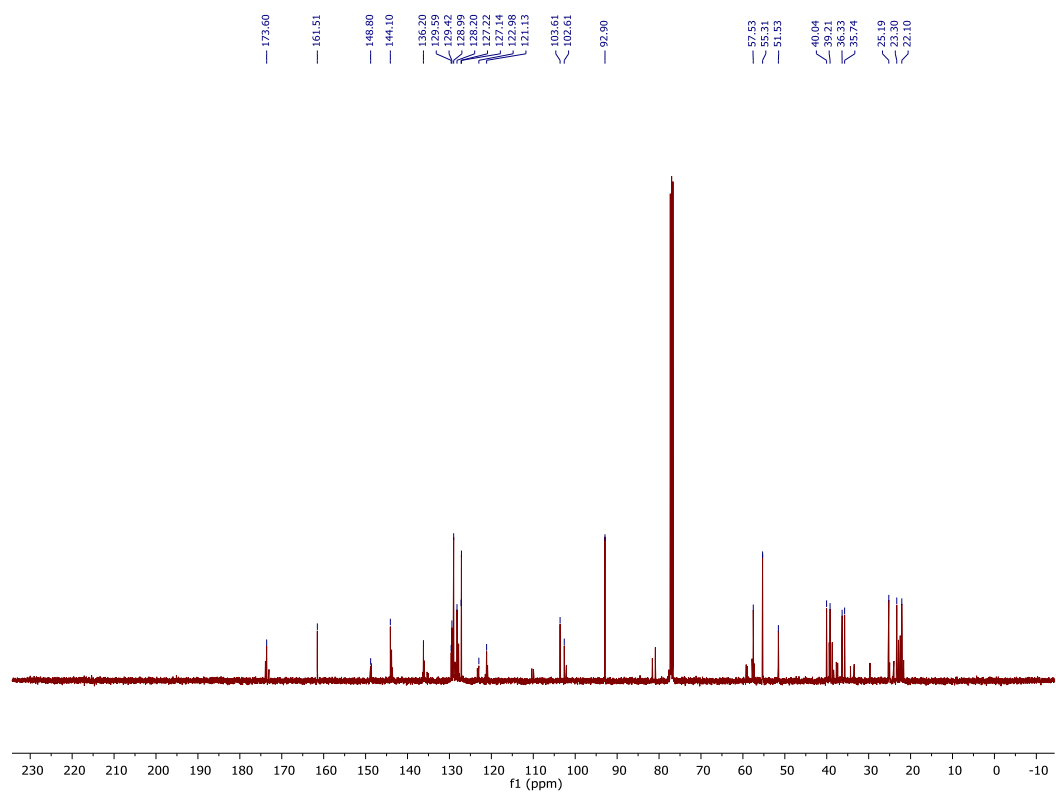

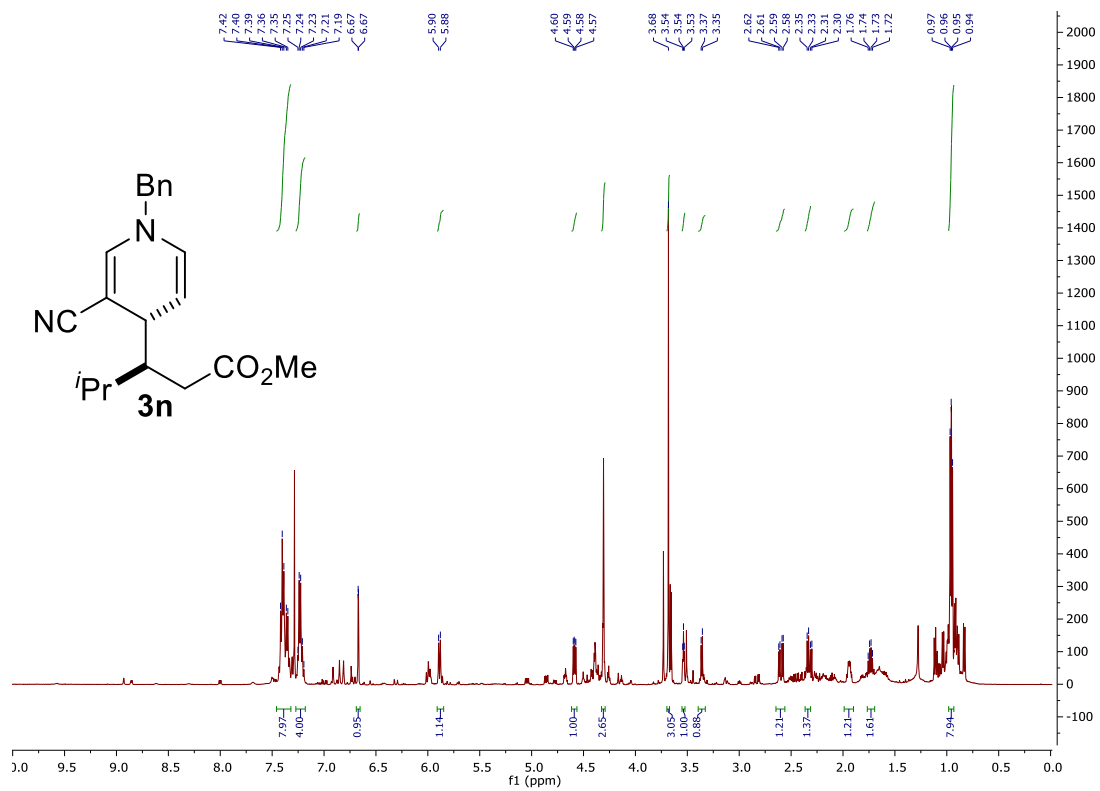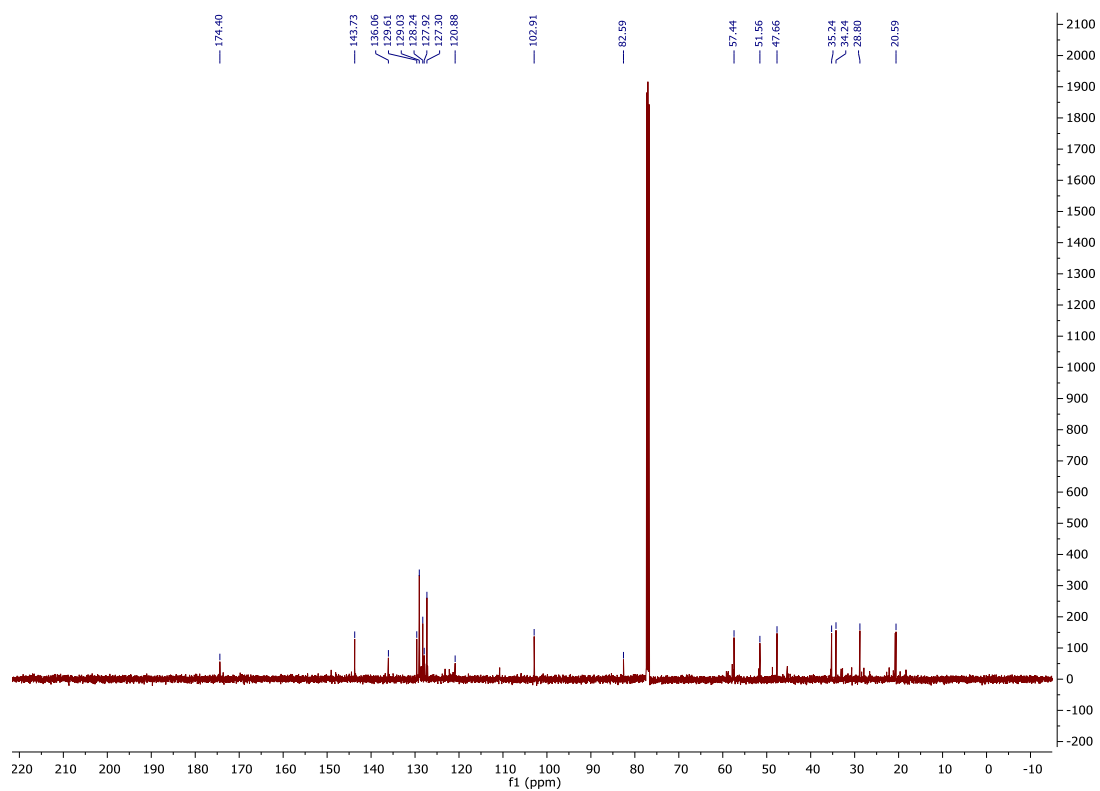



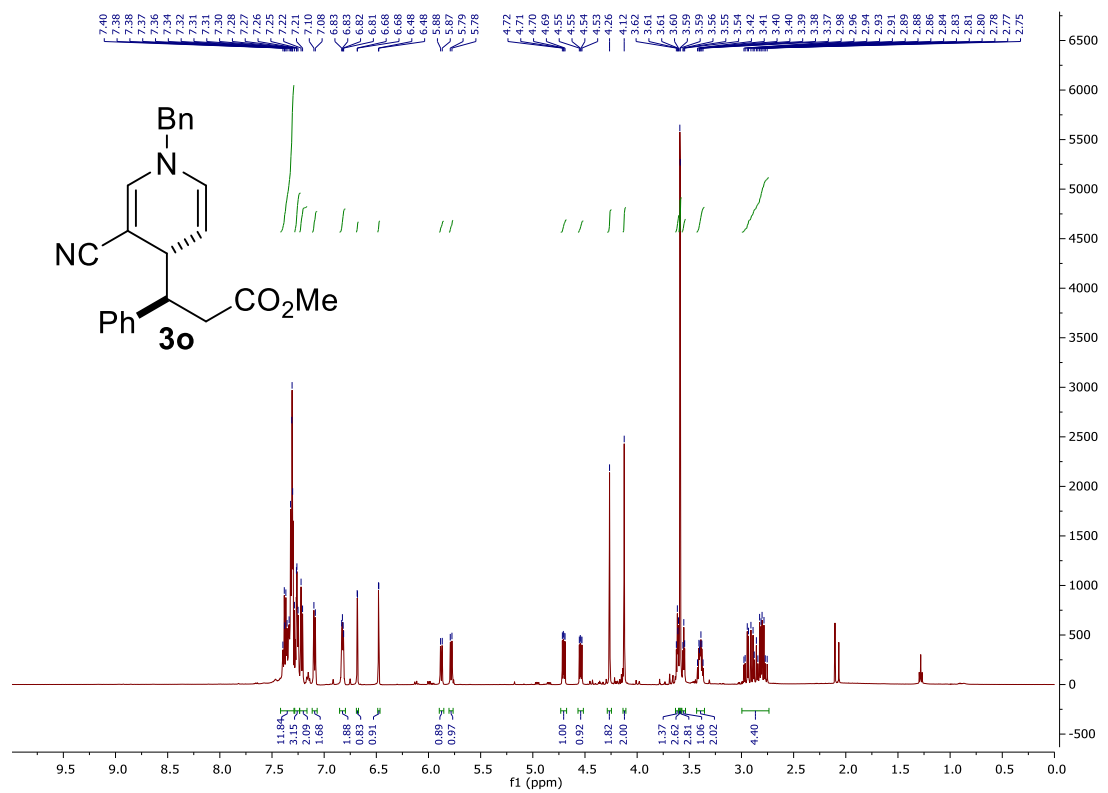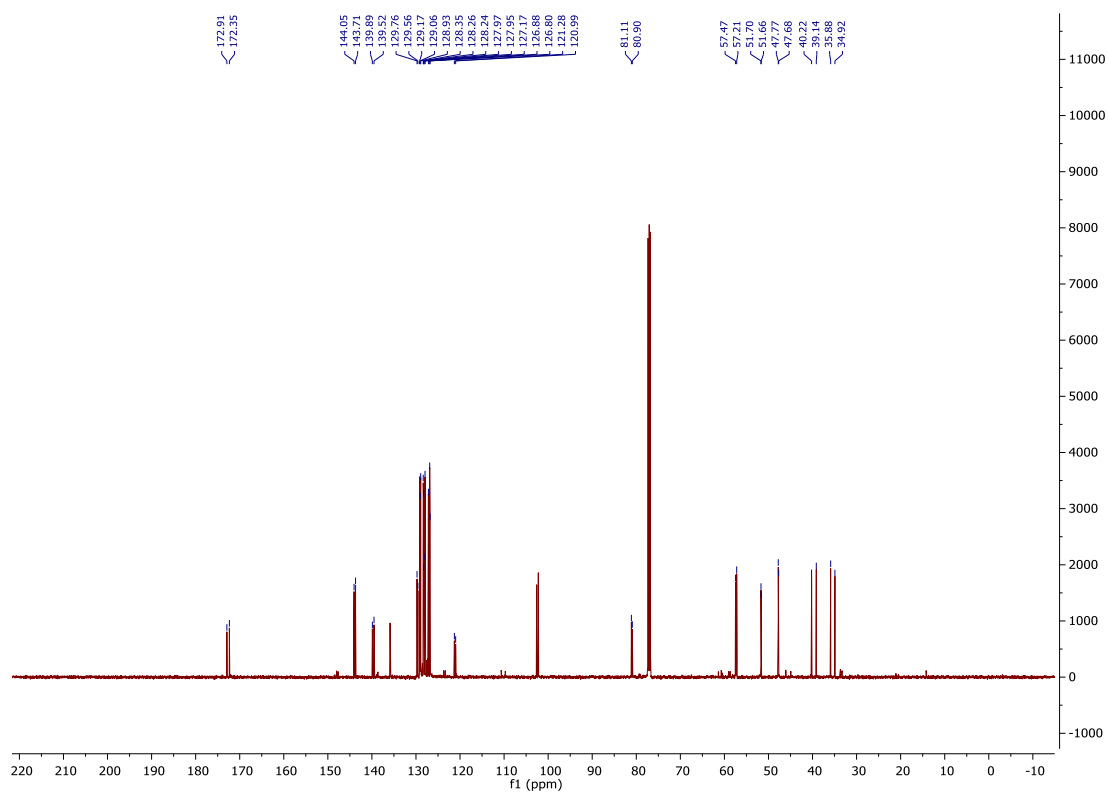

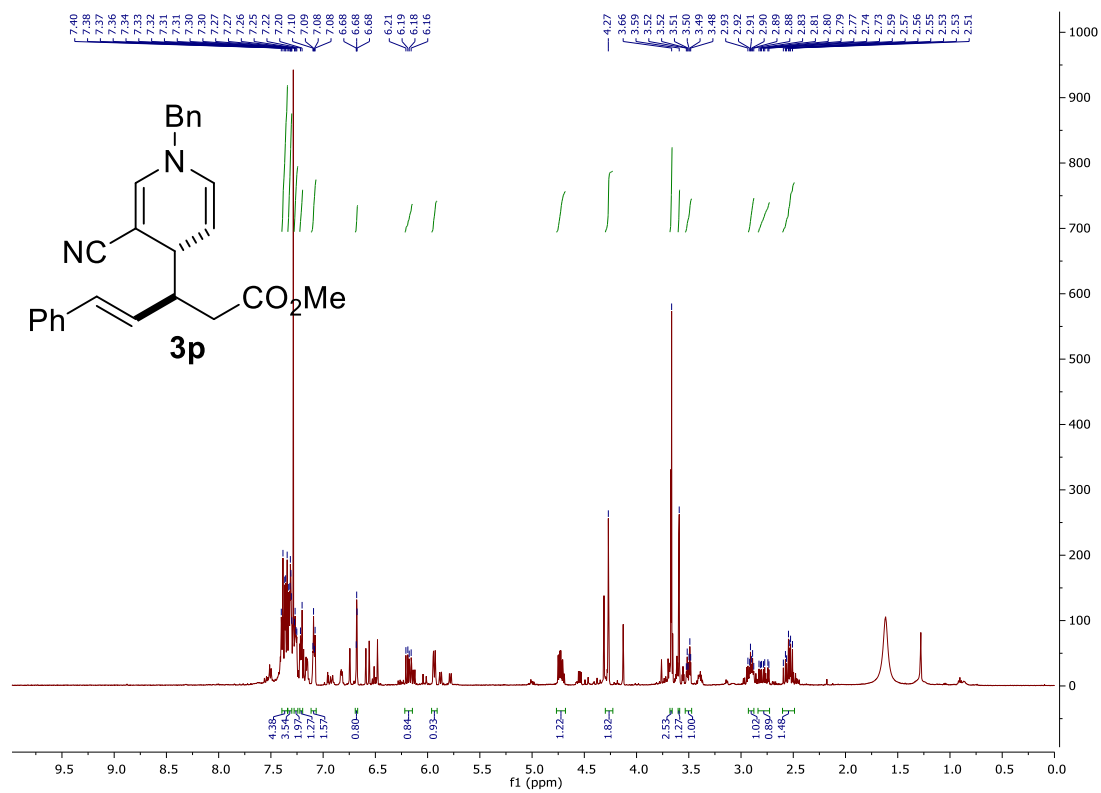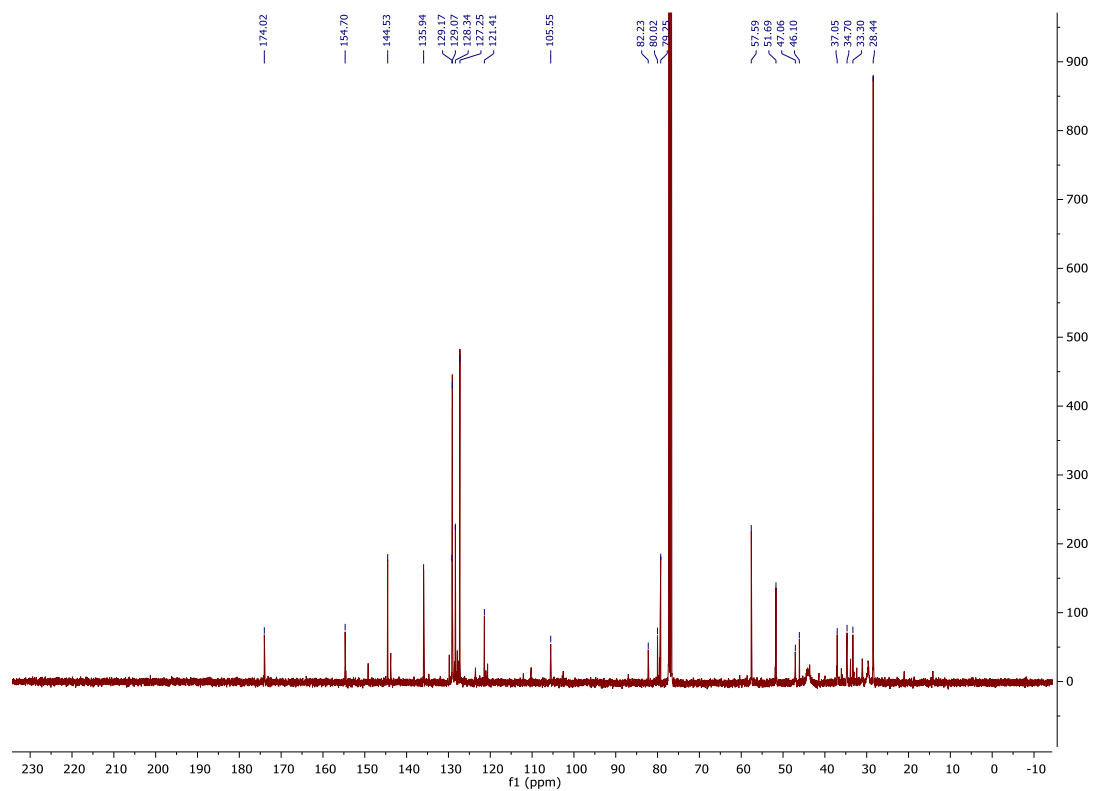

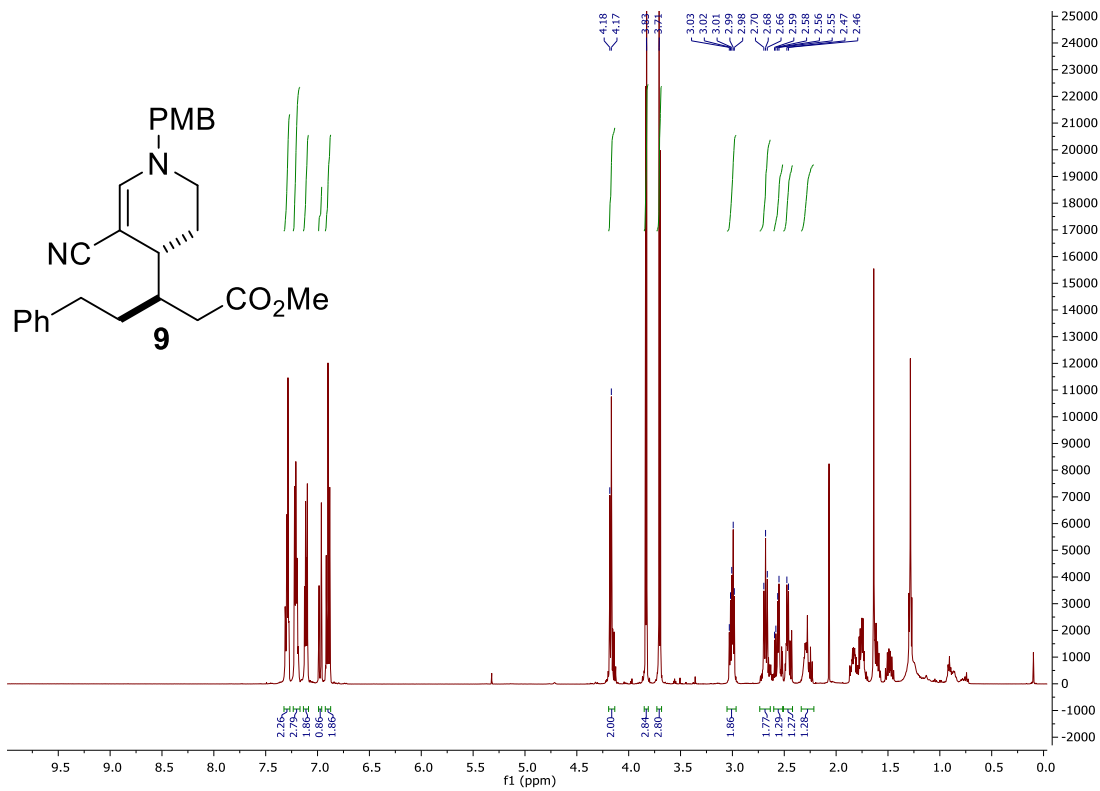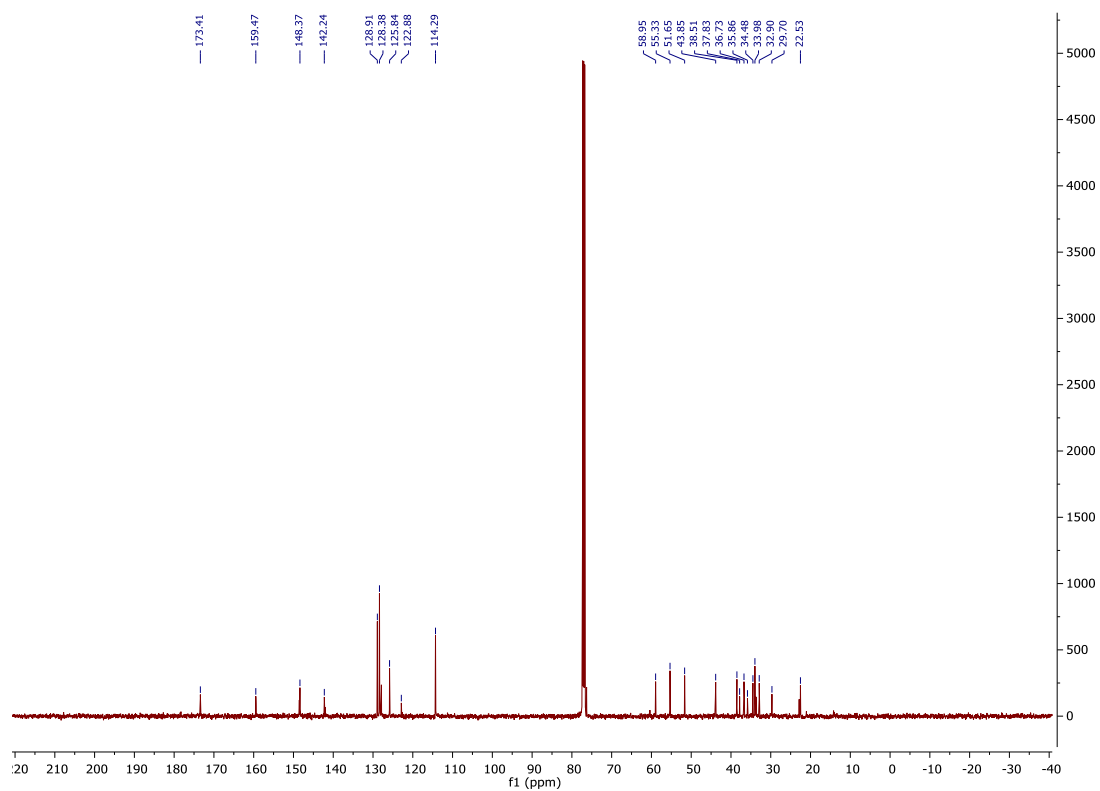

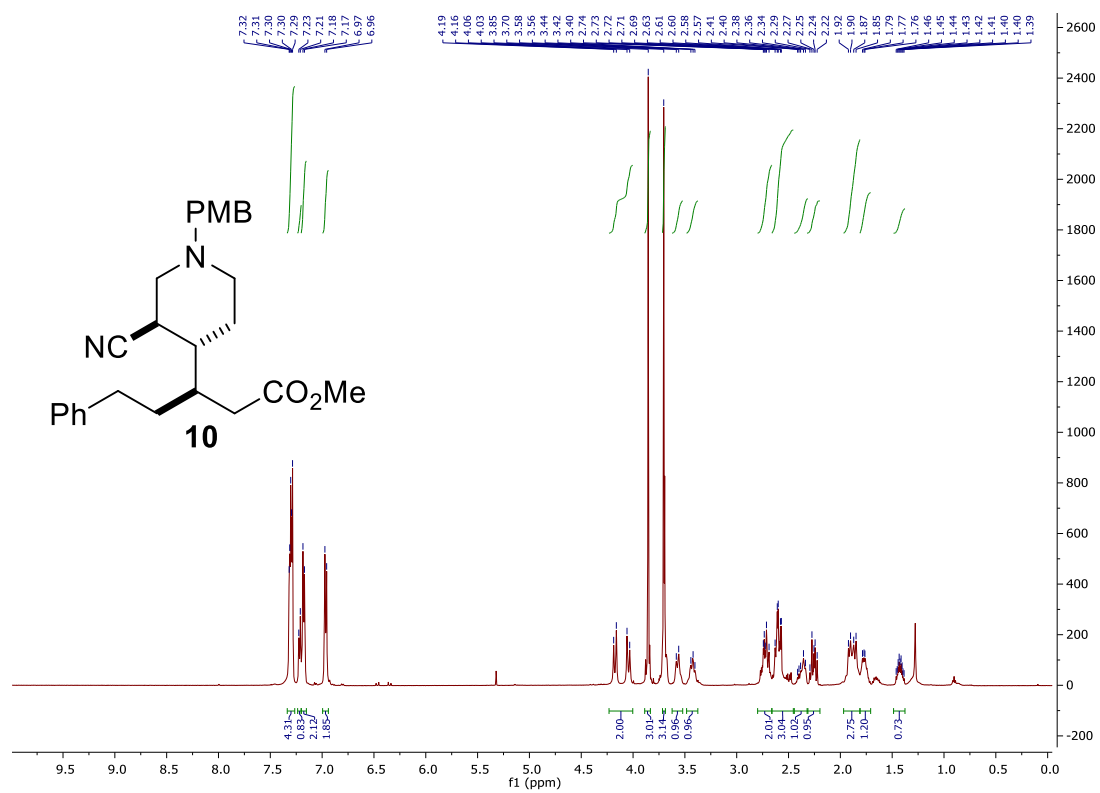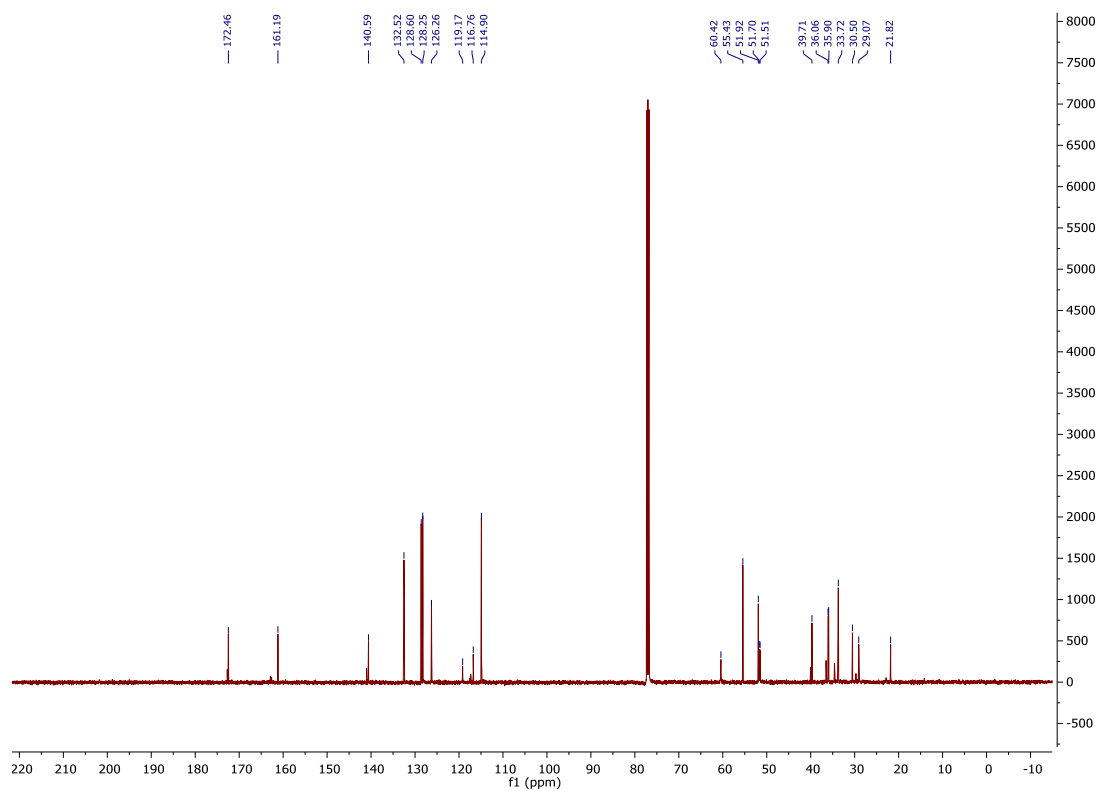

**Single crystal X-ray diffraction for compound 9.**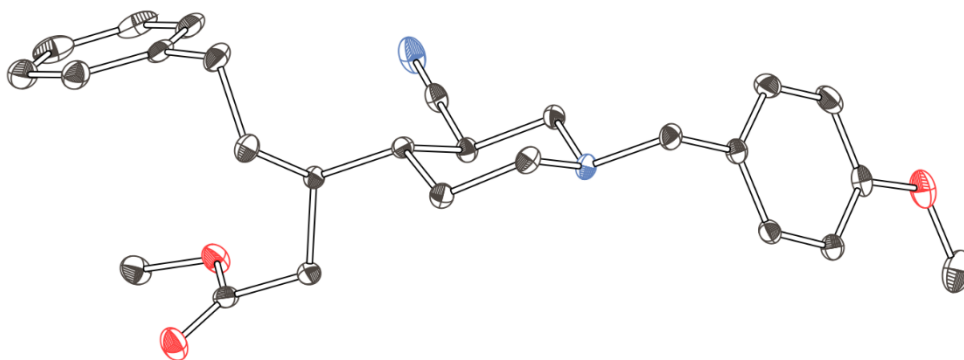

**Single crystal X-ray diffraction.**<sup>1</sup> Data for all compounds was collected on an Agilent SuperNova diffractometer using mirror-monochromated Cu K $\alpha$ . Data collection, integration, scaling (ABSPACK) and absorption correction (face-indexed Gaussian integration<sup>2</sup> or numeric analytical methods<sup>3</sup>) were performed in CrysAlisPro.<sup>4</sup> Structure solution was performed using ShelXT.<sup>5</sup> Subsequent refinement was performed by full-matrix least-squares on F<sup>2</sup> in ShelXL. Olex26 was used for viewing and to prepare CIF files. PLATON<sup>7</sup> was used for Bijvoet difference analysis of absolute structure (further details within). ORTEP graphics were prepared in CrystalMaker.<sup>8</sup> Thermal ellipsoids are rendered at the 50% probability level.

A single crystal of **9** was grown from a sample of 94% enantiomeric purity as determined by chiral HPLC. A dichloromethane solution was diluted with pentane by vapor diffusion to afford opaque, colorless blades. Part of a crystal (.20 x .05 x .05 mm) was separated carefully, mounted with STP oil treatment, and cooled to 100 K on the diffractometer. A full sphere of data were collected to 0.800 Å resolution. 43306 reflections were collected (4462 unique, 4366 observed) with R(int) 4.2% and R(sigma) 2.0% after Gaussian absorption and beam profile correction (Tmin .910, Tmax .977).

The space group was assigned as P2<sub>1</sub>2<sub>1</sub>2<sub>1</sub> based on the systematic absences. The structure solved routinely in ShelXT with 1 molecule in the asymmetric unit. All non-H atoms were located in the initial solution and refined anisotropically with no restraints. C-H hydrogens were placed in calculated positions and refined with riding coordinates and ADPs.

1 Single crystal X-ray diffraction was performed at the Shared Materials Characterization Laboratory at Columbia University. Use of the SMCL was made possible by funding from Columbia University.

2 Blanc, E.; Schwarzenbach, D.; Flack, H. D. *J. Appl. Cryst.* **24** (1991), 1035-1041.

3 Clark, R. C.; Reid, J. S. *Acta Cryst.* **A51** (1995), 887-897.

4 Version 1.171.37.35 (2014). Oxford Diffraction /Agilent Technologies UK Ltd, Yarnton, England.

5 Sheldrick, G. M. *Acta Cryst.* **A71** (2015), 3-8.

6 Dolomanov, O. V.; Bourhis, L. J.; Gildea, R. J.; Howard, J. A. K.; Puschmann, H. *J. Appl. Cryst.* **42** (2009), 339-341.

7 Spek, A. *Acta Cryst.* **D65** (2009), 148-155.

8 CrystalMaker Software Ltd, Oxford, England ([www.crystalmaker.com](http://www.crystalmaker.com)).

The final refinement (462 data, 0 restraints, 282 parameters) converged with  $R_1 (F_o > 4\sigma(F_o)) = 2.9\%$ ,  $wR_2 = 7.4\%$ ,  $S = 1.05$ . The largest Fourier features were 0.16 and  $-0.15 \text{ e}^- \text{ \AA}^{-3}$ .

A crystal with molecular formula  $\text{C}_{26}\text{H}_{32}\text{N}_2\text{O}_3$  is a reasonable target for absolute structure determination using Cu  $K\alpha$  radiation.<sup>9</sup> The Flack  $x$  parameter was 0.07(6) by the Parsons selected quotients method implemented in ShelXL. For confirmation of the absolute structure, the data set was analyzed by the probabilistic approach of Hooft, Straver, and Spek<sup>10</sup> as implemented in PLATON. Errors were assumed to be Gaussian; a normal probabilities plot was linear with correlation coefficient 0.999 and slope 0.956. Using an outlier criterion of 79.66 and sigma criterion of 0.25, 404 Bijvoet pairs were selected for analysis. The Hooft  $y$  parameter was 0.06(6) using these parameters. The probability of a racemic twin,  $P3(\text{rac-twin})$ , was calculated as  $4 \times 10^{-14}$  and the probability of an incorrect absolute structure,  $P3(\text{false})$ , was  $4 \times 10^{-63}$ . Therefore, we state with high confidence that the absolute structure is correctly assigned.

**Figure Sx.** Molecular structure of **9**.

| Compound                              | <b>9</b>                                         |
|---------------------------------------|--------------------------------------------------|
| <b>Formula</b>                        | $\text{C}_{26}\text{H}_{32}\text{N}_2\text{O}_3$ |
| <b>MW</b>                             | 420.53                                           |
| <b>Space group</b>                    | $P2_12_12_1$                                     |
| <b><math>a</math> (Å)</b>             | 6.27180(10)                                      |
| <b><math>b</math> (Å)</b>             | 14.71860(10)                                     |
| <b><math>c</math> (Å)</b>             | 24.2813(2)                                       |
| <b><math>\alpha</math> (°)</b>        | 90                                               |
| <b><math>\beta</math> (°)</b>         | 90                                               |
| <b><math>\gamma</math> (°)</b>        | 90                                               |
| <b><math>V</math> (Å<sup>3</sup>)</b> | 2241.46(4)                                       |
| <b>Z</b>                              | 4                                                |

<sup>9</sup> Parsons, S.; Flack, H. D.; Wagner, T. *Acta Cryst.* **B69** (2013), 249-259.

<sup>10</sup> Hooft, R. W. W.; Straver, L. H.; Spek, A. L. *J. Appl. Cryst.* **41** (2008), 96-103.

|                                                                             |                 |
|-----------------------------------------------------------------------------|-----------------|
| <b><math>\rho_{\text{calc}}</math> (g cm<sup>-3</sup>)</b>                  | 1.246           |
| <b>T (K)</b>                                                                | 100             |
| <b><math>\lambda</math> (Å)</b>                                             | 1.54184         |
| <b>2<math>\theta_{\text{min}}</math>, 2<math>\theta_{\text{max}}</math></b> | 7, 146          |
| <b>Nref</b>                                                                 | 43306           |
| <b>R(int), R(<math>\sigma</math>)</b>                                       | .0424, .0200    |
| <b><math>\mu</math>(mm<sup>-1</sup>)</b>                                    | 0.645           |
| <b>Size (mm)</b>                                                            | .20 x .05 x .05 |
| <b>T<sub>max</sub>, T<sub>min</sub></b>                                     | .977, .910      |
| <b>Data</b>                                                                 | 4462            |
| <b>Restraints</b>                                                           | 0               |
| <b>Parameters</b>                                                           | 282             |
| <b>R<sub>1</sub>(obs)</b>                                                   | 0.0288          |
| <b>wR<sub>2</sub>(all)</b>                                                  | 0.0743          |
| <b>S</b>                                                                    | 1.045           |
| <b>Peak, hole (e<sup>-</sup><br/>Å<sup>-3</sup>)</b>                        | 0.16, -0.15     |
| <b>Hooft y</b>                                                              | 0.06(6)         |

Table 1 Crystal data and structure refinement for bcorr\_a.

|                     |                                                               |
|---------------------|---------------------------------------------------------------|
| Identification code | bcorr_a                                                       |
| Empirical formula   | C <sub>26</sub> H <sub>32</sub> N <sub>2</sub> O <sub>3</sub> |
| Formula weight      | 420.53                                                        |
| Temperature/K       | 100.01(10)                                                    |
| Crystal system      | orthorhombic                                                  |
| Space group         | P2 <sub>1</sub> 2 <sub>1</sub> 2 <sub>1</sub>                 |
| a/Å                 | 6.27180(10)                                                   |
| b/Å                 | 14.71860(10)                                                  |
| c/Å                 | 24.2813(2)                                                    |
| $\alpha$ /°         | 90                                                            |
| $\beta$ /°          | 90                                                            |

|                                                |                                                               |
|------------------------------------------------|---------------------------------------------------------------|
| $\gamma/^\circ$                                | 90                                                            |
| Volume/ $\text{\AA}^3$                         | 2241.46(4)                                                    |
| Z                                              | 4                                                             |
| $\rho_{\text{calc}}/\text{g/cm}^3$             | 1.246                                                         |
| $\mu/\text{mm}^{-1}$                           | 0.645                                                         |
| F(000)                                         | 904.0                                                         |
| Crystal size/ $\text{mm}^3$                    | $0.196 \times 0.049 \times 0.048$                             |
| Radiation                                      | CuK $\alpha$ ( $\lambda = 1.54184$ )                          |
| 2 $\Theta$ range for data collection/ $^\circ$ | 7.022 to 145.98                                               |
| Index ranges                                   | $-7 \leq h \leq 7, -18 \leq k \leq 18, -29 \leq l \leq 30$    |
| Reflections collected                          | 43306                                                         |
| Independent reflections                        | 4462 [ $R_{\text{int}} = 0.0424, R_{\text{sigma}} = 0.0200$ ] |
| Data/restraints/parameters                     | 4462/0/282                                                    |
| Goodness-of-fit on $F^2$                       | 1.045                                                         |
| Final R indexes [ $I \geq 2\sigma(I)$ ]        | $R_1 = 0.0288, wR_2 = 0.0737$                                 |
| Final R indexes [all data]                     | $R_1 = 0.0296, wR_2 = 0.0743$                                 |
| Largest diff. peak/hole / $e \text{\AA}^{-3}$  | 0.16/-0.15                                                    |
| Flack parameter                                | 0.07(6)                                                       |

Table 2 Fractional Atomic Coordinates ( $\times 10^4$ ) and Equivalent Isotropic Displacement Parameters ( $\text{\AA}^2 \times 10^3$ ) for bcorr\_a.  $U_{\text{eq}}$  is defined as 1/3 of of the trace of the orthogonalised  $U_{\text{ij}}$  tensor.

| Atom | x        | y          | z         | U(eq)   |
|------|----------|------------|-----------|---------|
| N1   | 119(2)   | 6276.2(9)  | 4025.4(5) | 14.3(3) |
| C2   | 1459(3)  | 5863.1(10) | 3599.9(6) | 14.5(3) |
| C3   | 1802(3)  | 4848(1)    | 3725.0(6) | 13.8(3) |
| C4   | -340(3)  | 4333.5(10) | 3765.3(6) | 12.8(3) |
| C5   | -1718(3) | 4828.5(11) | 4189.4(7) | 15.3(3) |
| C6   | -1977(3) | 5828.5(11) | 4041.4(7) | 16.0(3) |
| C7   | -160(3)  | 7255.8(11) | 3914.0(7) | 16.4(3) |
| C8   | 1881(3)  | 7787.7(10) | 3960.5(7) | 15.4(3) |
| C9   | 2978(3)  | 8097.8(11) | 3497.2(7) | 19.8(3) |
| C10  | 4843(3)  | 8597.6(12) | 3544.5(7) | 21.7(3) |
| C11  | 5639(3)  | 8806.5(10) | 4066.3(7) | 17.7(3) |
| C12  | 4574(3)  | 8509.4(11) | 4535.4(7) | 16.5(3) |
| C13  | 2721(3)  | 7999.8(10) | 4476.1(6) | 15.2(3) |



|     |          |            |           |         |
|-----|----------|------------|-----------|---------|
| O14 | 7478(2)  | 9307.6(9)  | 4077.0(6) | 26.6(3) |
| C15 | 8326(3)  | 9528.5(14) | 4604.8(9) | 31.0(4) |
| C16 | 3128(3)  | 4455.1(11) | 3285.4(7) | 16.9(3) |
| N17 | 4098(3)  | 4146.8(10) | 2931.3(7) | 24.8(3) |
| C18 | -48(3)   | 3308.4(10) | 3871.2(6) | 12.9(3) |
| C19 | 699(3)   | 3095.3(11) | 4462.0(6) | 15.1(3) |
| C20 | 1311(3)  | 2110.6(11) | 4515.1(6) | 15.5(3) |
| O21 | 509(2)   | 1566.1(9)  | 4822.5(5) | 24.8(3) |
| O22 | 2912(2)  | 1902.1(8)  | 4168.6(5) | 20.4(3) |
| C23 | 3544(3)  | 961.9(12)  | 4143.5(7) | 23.6(4) |
| C24 | -2091(3) | 2778.0(11) | 3727.9(7) | 16.9(3) |
| C25 | -2258(3) | 2554.3(12) | 3110.6(7) | 21.1(4) |
| C26 | -737(3)  | 1811.4(12) | 2941.8(7) | 17.9(3) |
| C27 | -1243(3) | 906.5(13)  | 3052.4(7) | 21.1(4) |
| C28 | 167(3)   | 208.4(12)  | 2929.6(8) | 26.2(4) |
| C29 | 2117(3)  | 402.7(14)  | 2690.4(8) | 27.7(4) |
| C30 | 2639(3)  | 1295.0(15) | 2570.9(7) | 27.5(4) |
| C31 | 1223(3)  | 1995.3(13) | 2696.8(7) | 23.1(4) |

Table 3 Anisotropic Displacement Parameters ( $\text{\AA}^2 \times 10^3$ ) for bcorr\_a. The Anisotropic displacement factor exponent takes the form:  $-2\pi^2[h^2a^{*2}U_{11}+2hka^*b^*U_{12}+\dots]$ .

| Atom | $U_{11}$ | $U_{22}$ | $U_{33}$ | $U_{23}$ | $U_{13}$ | $U_{12}$ |
|------|----------|----------|----------|----------|----------|----------|
| N1   | 15.8(6)  | 10.9(6)  | 16.2(6)  | -2.7(5)  | 0.6(5)   | 1.1(5)   |
| C2   | 17.4(8)  | 11.6(7)  | 14.5(7)  | -0.5(6)  | 1.5(6)   | 0.1(6)   |
| C3   | 13.3(7)  | 12.9(7)  | 15.3(7)  | -0.7(6)  | 1.7(6)   | 1.1(6)   |
| C4   | 13.5(7)  | 13.3(7)  | 11.7(7)  | -0.9(5)  | -0.6(6)  | 0.5(6)   |
| C5   | 15.1(7)  | 15.4(7)  | 15.5(7)  | -1.2(6)  | 2.0(6)   | 0.1(6)   |
| C6   | 14.5(7)  | 15.1(7)  | 18.3(7)  | -4.3(6)  | -0.3(6)  | 2.5(6)   |
| C7   | 18.1(8)  | 12.1(7)  | 18.9(7)  | -1.8(6)  | -3.1(6)  | 3.9(6)   |
| C8   | 18.6(8)  | 10.9(7)  | 16.6(7)  | -0.5(6)  | -1.2(6)  | 3.0(6)   |
| C9   | 27.4(8)  | 16.7(8)  | 15.4(7)  | 1.3(6)   | -0.9(7)  | 4.4(7)   |
| C10  | 28.0(9)  | 18.1(8)  | 19.0(8)  | 5.6(6)   | 6.8(7)   | 2.9(7)   |
| C11  | 16.8(8)  | 10.9(7)  | 25.5(8)  | 1.4(6)   | 2.7(7)   | -0.2(6)  |
| C12  | 19.4(8)  | 12.7(7)  | 17.3(7)  | -0.7(6)  | -0.6(6)  | 3.0(6)   |
| C13  | 19.3(7)  | 12.1(7)  | 14.4(7)  | 1.0(6)   | 2.5(6)   | 1.4(6)   |
| O14  | 22.6(6)  | 20.4(6)  | 36.9(7)  | 2.9(5)   | 6.1(6)   | -5.2(5)  |
| C15  | 21.1(9)  | 25.7(10) | 46.1(12) | -7.9(8)  | -1.0(8)  | -5.2(7)  |

|     |          |          |         |          |         |         |
|-----|----------|----------|---------|----------|---------|---------|
| C16 | 16.9(7)  | 12.3(7)  | 21.5(8) | 2.6(6)   | 2.8(7)  | 0.5(6)  |
| N17 | 24.5(8)  | 18.7(7)  | 31.3(8) | 1.2(6)   | 13.0(7) | 2.0(6)  |
| C18 | 14.6(7)  | 11.5(7)  | 12.6(7) | -0.8(5)  | 0.5(6)  | 0.1(6)  |
| C19 | 18.4(7)  | 14.1(7)  | 12.8(7) | -0.4(6)  | 0.8(6)  | 0.5(6)  |
| C20 | 17.5(7)  | 17.0(8)  | 12.0(7) | -0.2(6)  | -1.5(6) | 0.8(6)  |
| O21 | 29.1(7)  | 19.1(6)  | 26.1(6) | 4.9(5)   | 8.4(5)  | 0.9(5)  |
| O22 | 23.3(6)  | 17.1(6)  | 20.7(6) | 2.7(4)   | 6.3(5)  | 4.6(5)  |
| C23 | 30.3(10) | 19.7(8)  | 21.0(8) | 0.9(7)   | 3.4(7)  | 10.8(7) |
| C24 | 14.1(7)  | 16.8(7)  | 19.8(8) | -3.5(6)  | -0.1(6) | -0.9(6) |
| C25 | 22.0(8)  | 18.3(8)  | 23.0(8) | -6.5(6)  | -9.3(7) | 4.1(7)  |
| C26 | 20.5(8)  | 19.5(8)  | 13.7(7) | -5.6(6)  | -4.9(6) | 1.8(7)  |
| C27 | 21.3(8)  | 21.9(9)  | 20.1(8) | -3.3(7)  | 1.4(7)  | 1.0(7)  |
| C28 | 36.3(10) | 21.0(8)  | 21.3(8) | -3.0(7)  | -0.3(8) | 7.9(8)  |
| C29 | 28.1(9)  | 35.8(10) | 19.3(8) | -10.1(7) | -5.3(7) | 13.0(8) |
| C30 | 18.5(8)  | 48.3(11) | 15.7(8) | -10.9(8) | -0.5(6) | -1.0(8) |
| C31 | 27.3(9)  | 26.9(9)  | 15.0(7) | -6.2(7)  | -3.0(7) | -6.8(7) |

Table 4 Bond Lengths for bcorr\_a.

| Atom | Atom | Length/Å   | Atom | Atom | Length/Å |
|------|------|------------|------|------|----------|
| N1   | C2   | 1.464(2)   | O14  | C15  | 1.425(3) |
| N1   | C6   | 1.471(2)   | C16  | N17  | 1.147(2) |
| N1   | C7   | 1.4775(19) | C18  | C19  | 1.541(2) |
| C2   | C3   | 1.540(2)   | C18  | C24  | 1.540(2) |
| C3   | C4   | 1.546(2)   | C19  | C20  | 1.505(2) |
| C3   | C16  | 1.472(2)   | C20  | O21  | 1.205(2) |
| C4   | C5   | 1.529(2)   | C20  | O22  | 1.345(2) |
| C4   | C18  | 1.541(2)   | O22  | C23  | 1.441(2) |
| C5   | C6   | 1.524(2)   | C24  | C25  | 1.538(2) |
| C7   | C8   | 1.505(2)   | C25  | C26  | 1.508(2) |
| C8   | C9   | 1.395(2)   | C26  | C27  | 1.395(3) |
| C8   | C13  | 1.394(2)   | C26  | C31  | 1.392(3) |
| C9   | C10  | 1.387(3)   | C27  | C28  | 1.388(3) |
| C10  | C11  | 1.396(3)   | C28  | C29  | 1.384(3) |
| C11  | C12  | 1.391(2)   | C29  | C30  | 1.384(3) |
| C11  | O14  | 1.369(2)   | C30  | C31  | 1.395(3) |
| C12  | C13  | 1.391(2)   |      |      |          |

Table 5 Bond Angles for bcorr\_a.

| Atom | Atom | Atom | Angle/°    | Atom | Atom | Atom | Angle/°    |
|------|------|------|------------|------|------|------|------------|
| C2   | N1   | C6   | 110.21(12) | C12  | C13  | C8   | 121.98(15) |
| C2   | N1   | C7   | 110.13(13) | C11  | O14  | C15  | 117.03(14) |
| C6   | N1   | C7   | 109.63(13) | N17  | C16  | C3   | 177.57(19) |
| N1   | C2   | C3   | 110.12(13) | C19  | C18  | C4   | 112.99(12) |
| C2   | C3   | C4   | 111.48(13) | C24  | C18  | C4   | 111.08(13) |
| C16  | C3   | C2   | 108.50(13) | C24  | C18  | C19  | 111.09(13) |
| C16  | C3   | C4   | 110.16(13) | C20  | C19  | C18  | 110.68(13) |
| C5   | C4   | C3   | 107.48(12) | O21  | C20  | C19  | 125.94(15) |
| C5   | C4   | C18  | 114.91(13) | O21  | C20  | O22  | 123.17(15) |
| C18  | C4   | C3   | 112.76(13) | O22  | C20  | C19  | 110.89(13) |
| C6   | C5   | C4   | 111.21(13) | C20  | O22  | C23  | 116.80(13) |
| N1   | C6   | C5   | 110.10(13) | C25  | C24  | C18  | 112.67(14) |
| N1   | C7   | C8   | 113.15(13) | C26  | C25  | C24  | 112.14(14) |
| C9   | C8   | C7   | 121.95(15) | C27  | C26  | C25  | 119.71(16) |
| C13  | C8   | C7   | 120.36(15) | C31  | C26  | C25  | 122.27(17) |
| C13  | C8   | C9   | 117.68(15) | C31  | C26  | C27  | 117.97(16) |
| C10  | C9   | C8   | 121.52(16) | C28  | C27  | C26  | 121.33(18) |
| C9   | C10  | C11  | 119.58(15) | C29  | C28  | C27  | 120.02(18) |
| C12  | C11  | C10  | 120.15(15) | C28  | C29  | C30  | 119.54(17) |
| O14  | C11  | C10  | 115.91(16) | C29  | C30  | C31  | 120.31(18) |
| O14  | C11  | C12  | 123.94(16) | C26  | C31  | C30  | 120.82(18) |
| C13  | C12  | C11  | 119.08(15) |      |      |      |            |

Table 6 Hydrogen Atom Coordinates ( $\text{\AA} \times 10^4$ ) and Isotropic Displacement Parameters ( $\text{\AA}^2 \times 10^3$ ) for bcorr\_a.

| Atom | x        | y       | z       | U(eq) |
|------|----------|---------|---------|-------|
| H2A  | 2853.28  | 6177.35 | 3586.59 | 17    |
| H2B  | 765.53   | 5931.28 | 3235.89 | 17    |
| H3   | 2574.74  | 4789.21 | 4083.55 | 17    |
| H4   | -1066.41 | 4397.43 | 3400.7  | 15    |
| H5A  | -3139.3  | 4537.51 | 4207.03 | 18    |
| H5B  | -1049.18 | 4776.88 | 4557.38 | 18    |
| H6A  | -2676.27 | 5883.14 | 3677.39 | 19    |

|      |          |         |         |    |
|------|----------|---------|---------|----|
| H6B  | -2894.38 | 6130.8  | 4317.98 | 19 |
| H7A  | -1212.7  | 7506.56 | 4177.13 | 20 |
| H7B  | -745.44  | 7332.95 | 3538.2  | 20 |
| H9   | 2434.1   | 7963.51 | 3141.25 | 24 |
| H10  | 5574.35  | 8796.57 | 3223.86 | 26 |
| H12  | 5105.5   | 8652.52 | 4891.38 | 20 |
| H13  | 2005.72  | 7789.92 | 4796.73 | 18 |
| H15A | 7284.82  | 9890.72 | 4810.51 | 46 |
| H15B | 9643.65  | 9878.76 | 4559.29 | 46 |
| H15C | 8634.51  | 8968    | 4807.61 | 46 |
| H18  | 1094.73  | 3091.49 | 3615.82 | 15 |
| H19A | 1938.99  | 3482.11 | 4555    | 18 |
| H19B | -461.77  | 3236.03 | 4724.84 | 18 |
| H23A | 3641.51  | 715.67  | 4517.63 | 35 |
| H23B | 4935.95  | 913.9   | 3962.51 | 35 |
| H23C | 2484.05  | 616.76  | 3933.33 | 35 |
| H24A | -2115.35 | 2204.92 | 3941.27 | 20 |
| H24B | -3347.29 | 3141.71 | 3838.83 | 20 |
| H25A | -3735.01 | 2362.61 | 3025.43 | 25 |
| H25B | -1948.66 | 3108.38 | 2893.79 | 25 |
| H27  | -2580.6  | 765.33  | 3215.07 | 25 |
| H28  | -207.15  | -402.92 | 3009.68 | 31 |
| H29  | 3090.74  | -73.01  | 2608.75 | 33 |
| H30  | 3968.13  | 1431.03 | 2402.39 | 33 |
| H31  | 1599.86  | 2605.42 | 2614.37 | 28 |

## Experimental

Single crystals of  $C_{26}H_{32}N_2O_3$  [bcorr\_a] were []. A suitable crystal was selected and [] on a SuperNova, Dual, Cu at zero, EosS2 diffractometer. The crystal was kept at 100.01(10) K during data collection. Using Olex2 [1], the structure was solved with the ShelXT [2] structure solution program using Intrinsic Phasing and refined with the ShelXL [3] refinement package using Least Squares minimisation.

1. Dolomanov, O.V., Bourhis, L.J., Gildea, R.J, Howard, J.A.K. & Puschmann, H. (2009), *J. Appl. Cryst.* 42, 339-341.
2. Sheldrick, G.M. (2015). *Acta Cryst.* A71, 3-8.
3. Sheldrick, G.M. (2015). *Acta Cryst.* C71, 3-8.

Crystal structure determination of [bcorr\_a]

**Crystal Data** for  $C_{26}H_{32}N_2O_3$  ( $M=420.53$  g/mol): orthorhombic, space group  $P2_12_12_1$  (no. 19),  $a = 6.27180(10)$  Å,  $b = 14.71860(10)$  Å,  $c = 24.2813(2)$  Å,  $V = 2241.46(4)$  Å<sup>3</sup>,  $Z = 4$ ,  $T = 100.01(10)$  K,  $\mu(\text{CuK}\alpha) = 0.645$  mm<sup>-1</sup>,  $D_{\text{calc}} = 1.246$  g/cm<sup>3</sup>, 43306 reflections measured ( $7.022^\circ \leq 2\theta \leq 145.98^\circ$ ), 4462 unique ( $R_{\text{int}} = 0.0424$ ,  $R_{\text{sigma}} = 0.0200$ ) which were used in all calculations. The final  $R_1$  was 0.0288 ( $I > 2\sigma(I)$ ) and  $wR_2$  was 0.0743 (all data).

#### Refinement model description

Number of restraints - 0, number of constraints - unknown.

#### Details:

##### 1. Fixed Uiso

At 1.2 times of:

All C(H) groups, All C(H,H) groups

At 1.5 times of:

All C(H,H,H) groups

##### 2.a Ternary CH refined with riding coordinates:

C3(H3), C4(H4), C18(H18)

##### 2.b Secondary CH2 refined with riding coordinates:

C2(H2A,H2B), C5(H5A,H5B), C6(H6A,H6B), C7(H7A,H7B), C19(H19A,H19B), C24(H24A,H24B), C25(H25A,H25B)

##### 2.c Aromatic/amide H refined with riding coordinates:

C9(H9), C10(H10), C12(H12), C13(H13), C27(H27), C28(H28), C29(H29), C30(H30), C31(H31)

##### 2.d Idealised Me refined as rotating group:

C15(H15A,H15B,H15C), C23(H23A,H23B,H23C)
